# Supplementary material for: Comparing the structures and photophysical properties of two charge transfer co-crystals
Source: Royal Society of Chemistry journal article supplement (doi:10.1039/d3cp03720g), 2023-01-01
Supplement: d3cp03720g1.pdf [file d3cp03720g1.pdf]

# Supporting Information:

## Comparing the Structures and Photophysical Properties of Two Charge Transfer Co-crystals

Ali Abou Taka,<sup>†</sup> Joseph E. Reynolds III,<sup>†</sup> Neil C. Cole-Filipiak,<sup>†</sup> Mohana Shivanna,<sup>†</sup> Christine J. Yu,<sup>‡</sup> Patrick Feng,<sup>†</sup> Mark D. Allendorf,<sup>†</sup> Krupa Ramasesha,<sup>†</sup> Vitalie Stavila,<sup>†</sup> and Laura M. McCaslin<sup>\*,†</sup>

<sup>†</sup>*Combustion Research Facility, Sandia National Laboratories, Livermore, California 94550, USA*

<sup>‡</sup>*Department of Chemistry, Northwestern University, Evanston, Illinois 60208, USA*

E-mail: [Immccas@sandia.gov](mailto:Immccas@sandia.gov)

# Contents

|          |                                                                         |             |
|----------|-------------------------------------------------------------------------|-------------|
| <b>1</b> | <b>Experimental Results</b>                                             | <b>S-3</b>  |
| 1.1      | Figures . . . . .                                                       | S-3         |
| 1.2      | Band Gap Analysis . . . . .                                             | S-9         |
| <b>2</b> | <b>Computational Results</b>                                            | <b>S-11</b> |
| 2.1      | Further analysis of the Npe:TCNB theoretical dimer structures . . . . . | S-11        |
| 2.2      | Further analysis of the Npe:TCNQ theoretical dimer structures . . . . . | S-11        |
| 2.3      | Figures . . . . .                                                       | S-12        |
| 2.4      | Energetics . . . . .                                                    | S-17        |
| 2.5      | Excited State Properties . . . . .                                      | S-18        |
| 2.5.1    | Npe:TCNQ . . . . .                                                      | S-18        |
| 2.5.2    | Npe:TCNB . . . . .                                                      | S-22        |
| 2.6      | Geometries . . . . .                                                    | S-28        |
| 2.6.1    | Monomer Optimized Geometries . . . . .                                  | S-28        |
| 2.6.2    | Npe:TCNQ Optimized Geometries . . . . .                                 | S-31        |
| 2.6.3    | Npe:TCNB Optimized Geometries . . . . .                                 | S-35        |
| <b>3</b> | <b>Crystal data and structure</b>                                       | <b>S-41</b> |

# 1 Experimental Results

## 1.1 Figures

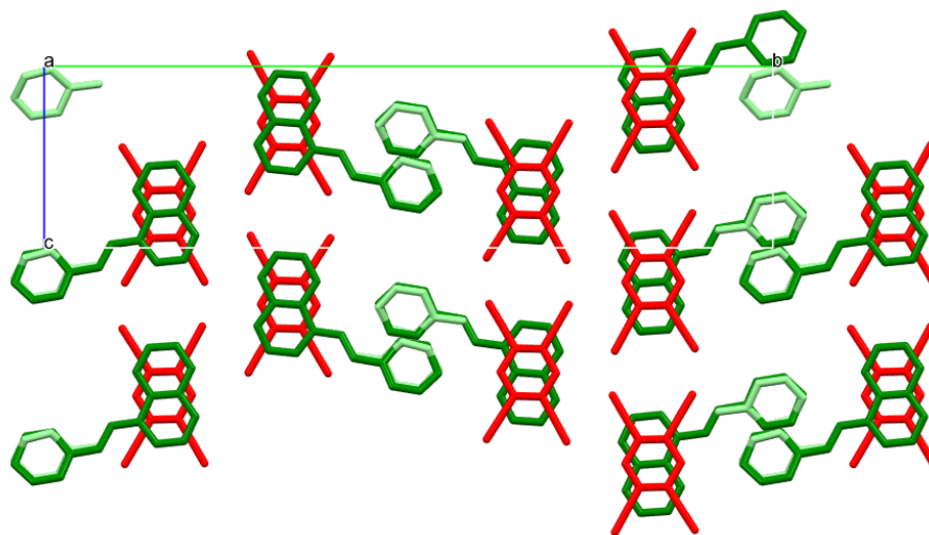

**Figure S1:** Expanded unit cell of Npe:TCNB (view along the crystallographic a-axis).

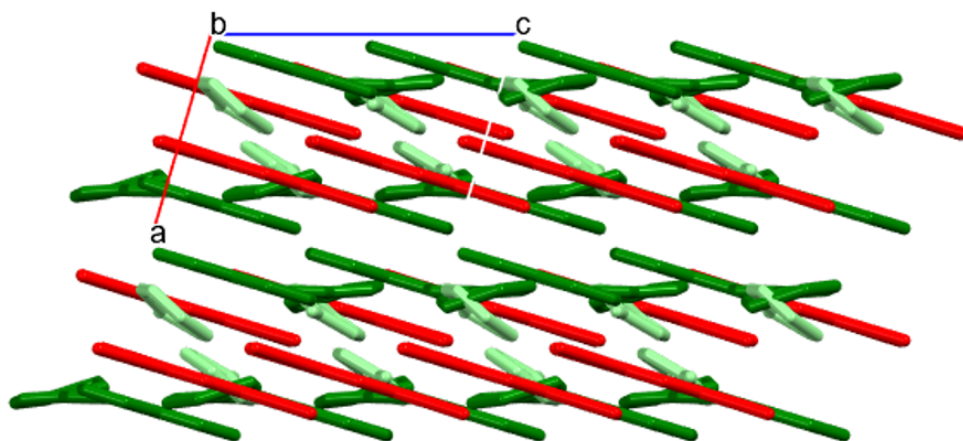

**Figure S2:** Expanded unit cell of Npe:TCNB (view along the crystallographic b-axis).

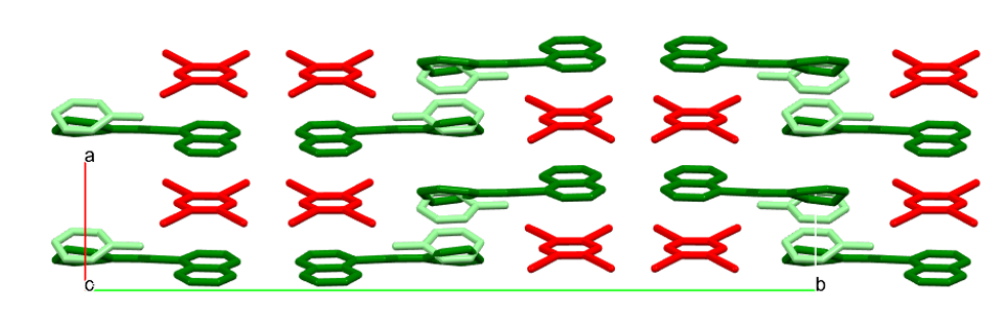

**Figure S3:** Expanded unit cell of Npe:TCNB (view along the crystallographic c-axis).

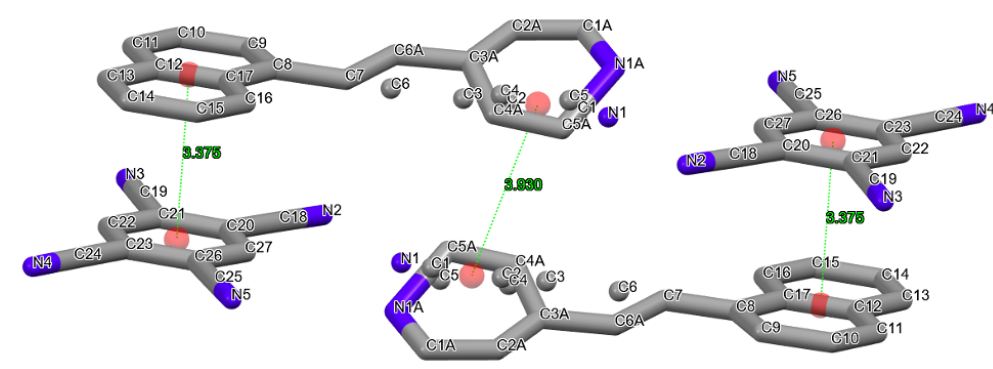

**Figure S4:** Expanded asymmetric unit of Npe:TCNB (interatomic distances in Å).

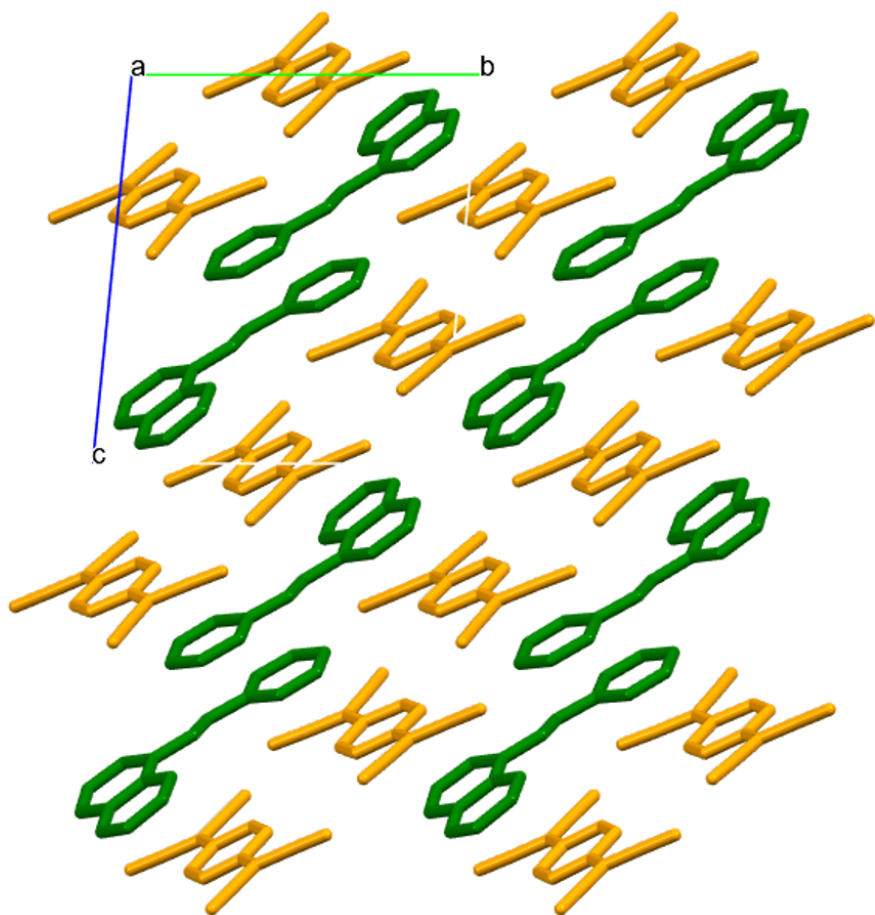

**Figure S5:** Expanded unit cell of Npe:TCNQ (view along the crystallographic a-axis).

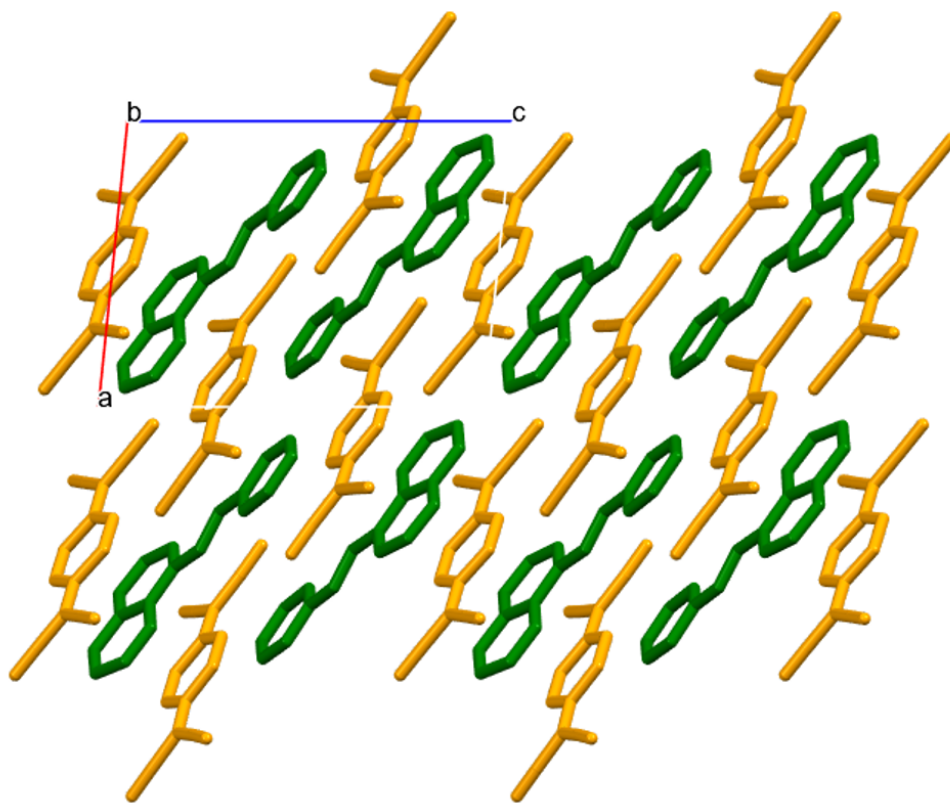

**Figure S6:** Expanded unit cell of Npe:TCNQ (view along the crystallographic b-axis).

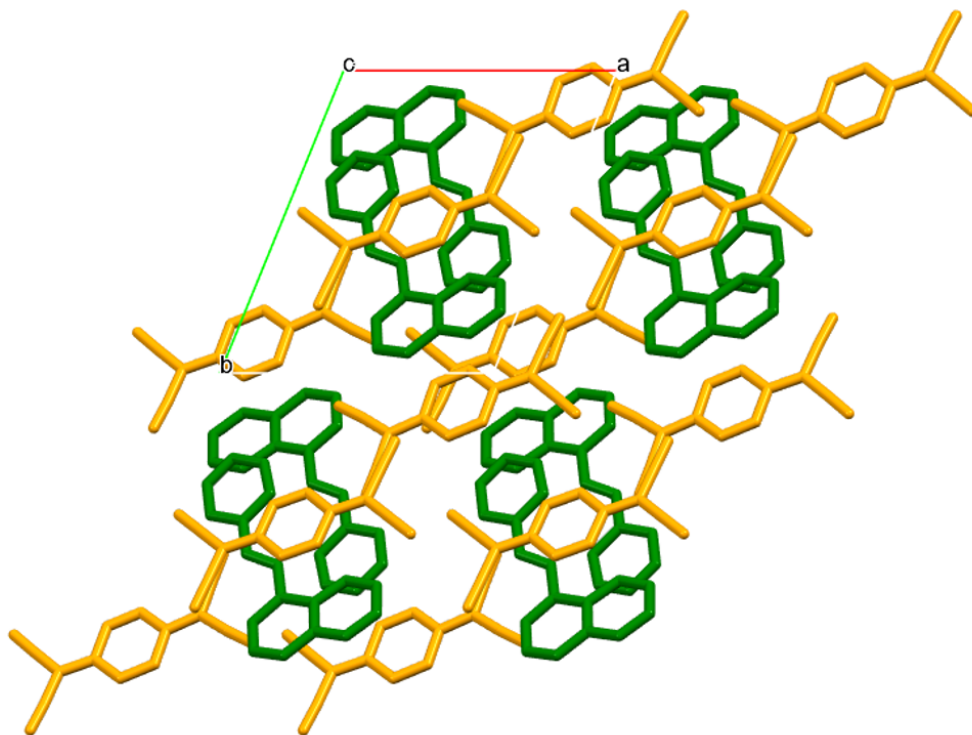

**Figure S7:** Expanded unit cell of Npe:TCNQ (view along the crystallographic c-axis).

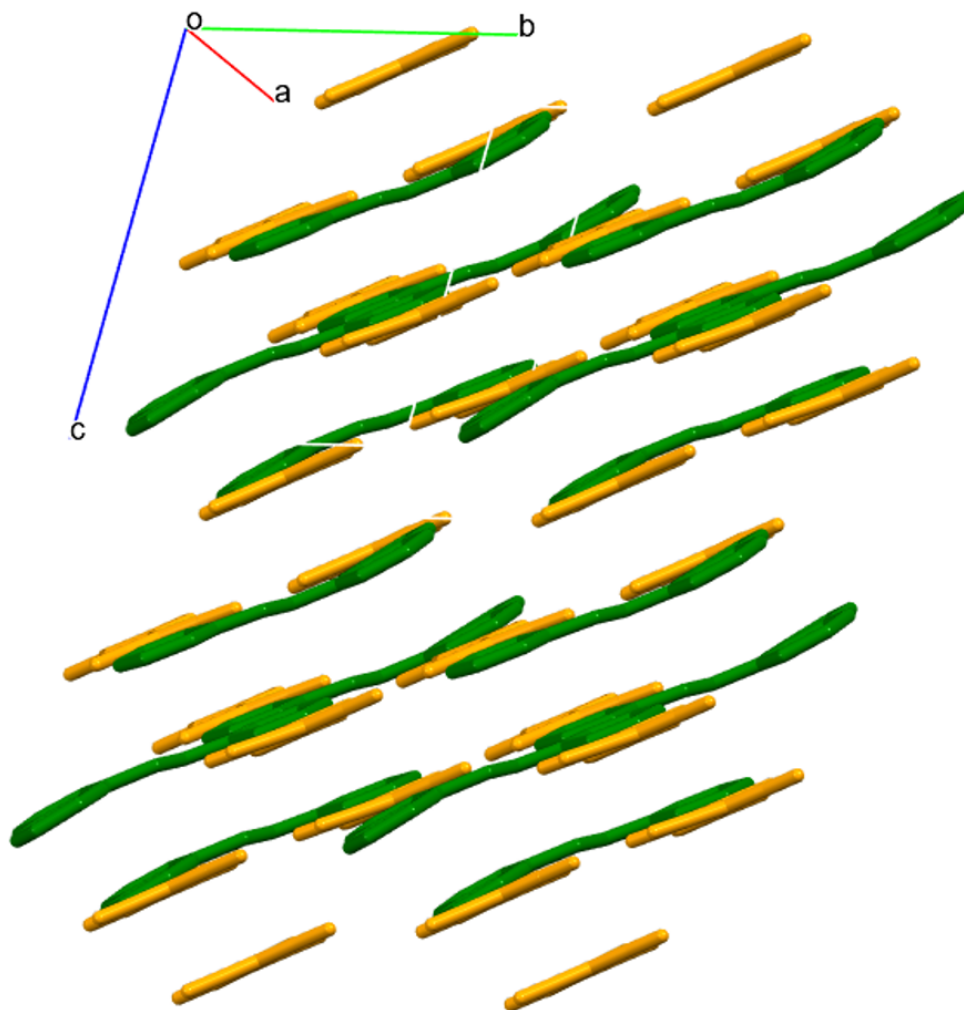

**Figure S8:** Expanded unit cell of Npe:TCNQ (view along off angle to show layered structure).

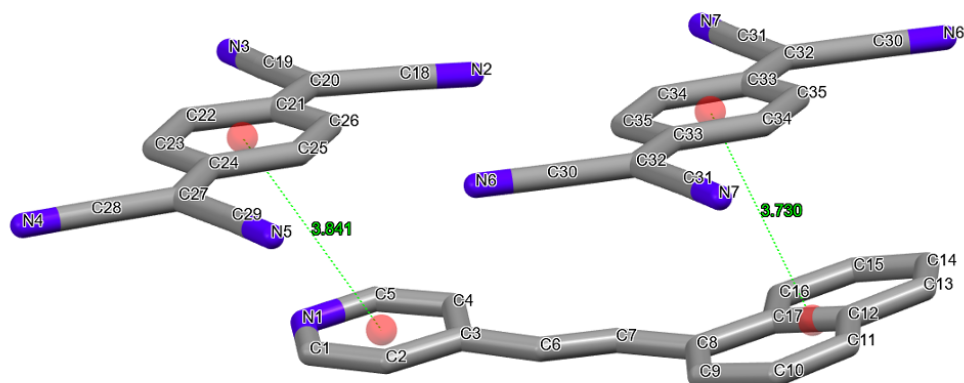

**Figure S9:** Expanded asymmetric unit of Npe:TCNQ (interatomic distances in Å).

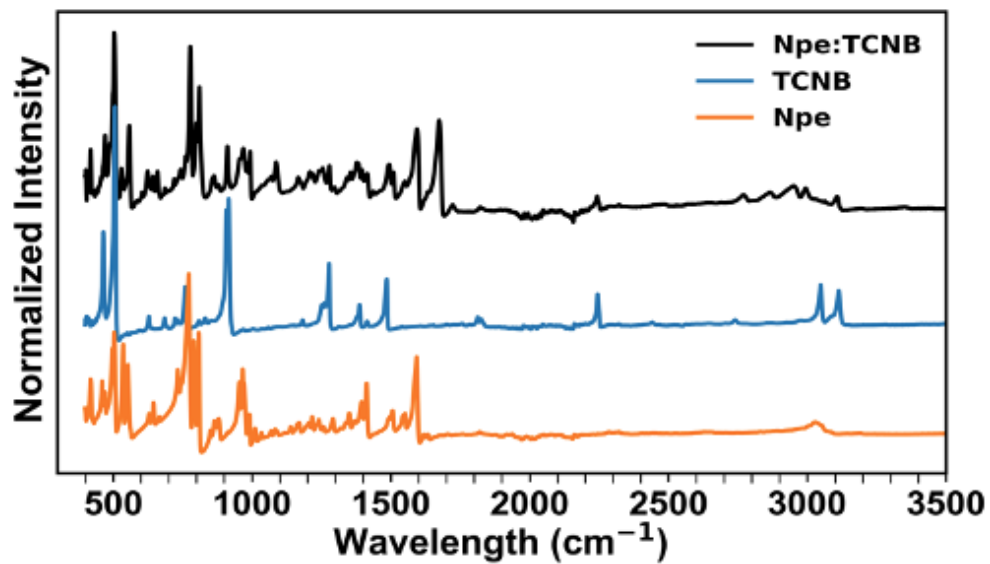

**Figure S10:** Infrared spectra of Npe, TCNB, and Npe:TCNB co-crystals.

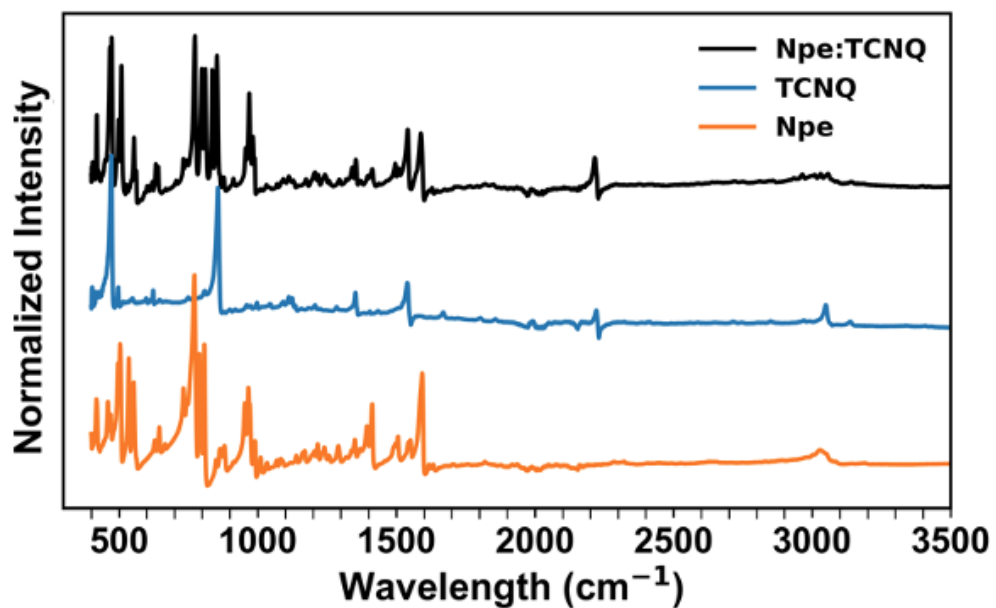

**Figure S11:** Infrared spectra of Npe, TCNQ, and Npe:TCNQ co-crystals.



## 1.2 Band Gap Analysis

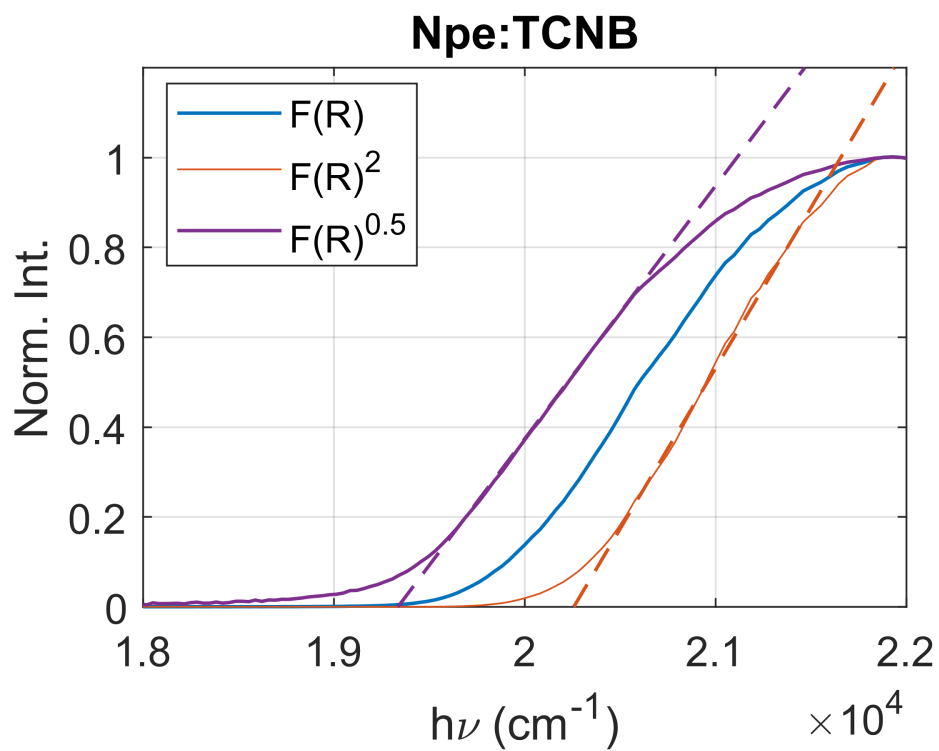

**Figure S12:** Plots of  $F(R)1/\gamma$  vs. photon energy for Npe:TCNB.

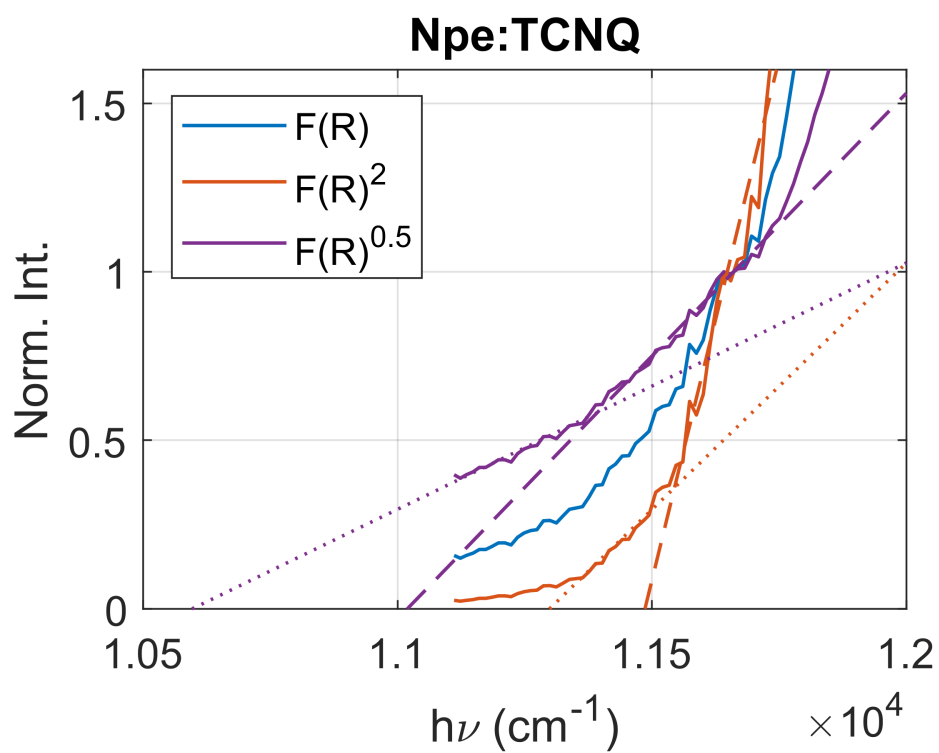

**Figure S13:** Plots of  $F(R)1/\gamma$  vs. photon energy for Npe:TCNQ. Due to the vibronic structure observed in Npe:TCNQ, multiple linear fits were performed up to the lowest energy shoulder at  $11600 \text{ cm}^{-1}$ .

## 2 Computational Results

### 2.1 Further analysis of the Npe:TCNB theoretical dimer structures

The centroid-centroid distances between Npe and TCNB in the six isomers shown in Figure 2 agree with the experimentally observed distances, ranging between 3.3 and 3.5 Å. The values quantifying degree of CT are very consistent for all isomers in the  $S_0$  and  $S_1$  states, varying between 0.01e and 0.02e in  $S_0$  and between 0.96e and 0.98e in  $S_1$ , as shown in Figure 2. In all isomers found, the  $S_1$  state is a CT state characterized by the HOMO to LUMO transition. The computed oscillator strengths of these transitions, however, are quite different. Isomers a, d, and e exhibit  $S_1$  oscillator strengths with values of 0.021, 0.016, and 0.023 a.u., respectively, higher than the other conformers where the  $S_1$  state oscillator strength values range from 0.002 to 0.009 a.u. Of these, structure a (the lowest-energy isomer) is far closer geometrically to the experimental crystal structure than d or e, allowing structure a to emerge as the best model for Npe:TCNB, as predicted from energetic arguments alone in Section 3.1.

### 2.2 Further analysis of the Npe:TCNQ theoretical dimer structures

Between Npe and TCNQ, a centroid-centroid intermolecular distance of 3.4 Å is found in all structures except b, which exhibits a smaller distance of 3.2 Å. This shorter distance can be explained by the alignment between the TCNQ and Npe molecules, resulting in strong hydrogen bonding between the N atoms of the TCNQ and the H atoms of the Npe pyridine ring. In analysis of the degree of CT in the  $S_0$  and  $S_1$  states, we find that these quantities vary between conformers of Npe:TCNQ far more than in Npe:TCNB. In the  $S_0$  state, CT values range from 0.01 to 0.07e, while in the  $S_1$  state, CT values range from 0.92 to 0.97, exhibiting neutral character in the  $S_0$  state and ionic character in the  $S_1$  state, a trend also seen in Npe:TCNB. We turn to the  $S_1$  oscillator strength to assess our choice of the lowest-energy conformer a as our model. Indeed, we find that conformer a emerges as the optimal candidate, as its  $S_1$  oscillator strength is sufficiently large (0.030 a.u. compared to 0.002 a.u. in structurally similar isomer d).

## 2.3 Figures

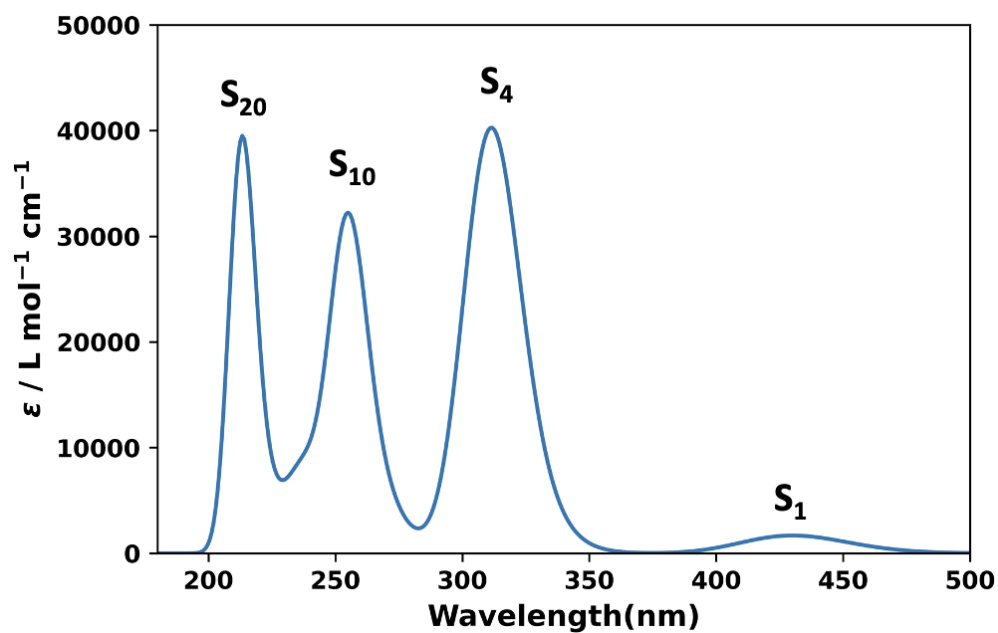

**Figure S14:** Simulated UV-Vis absorption spectra of Npe:TCNB conformer a, computed with CAM-B3LYP-D3/6-31+G(d,p).

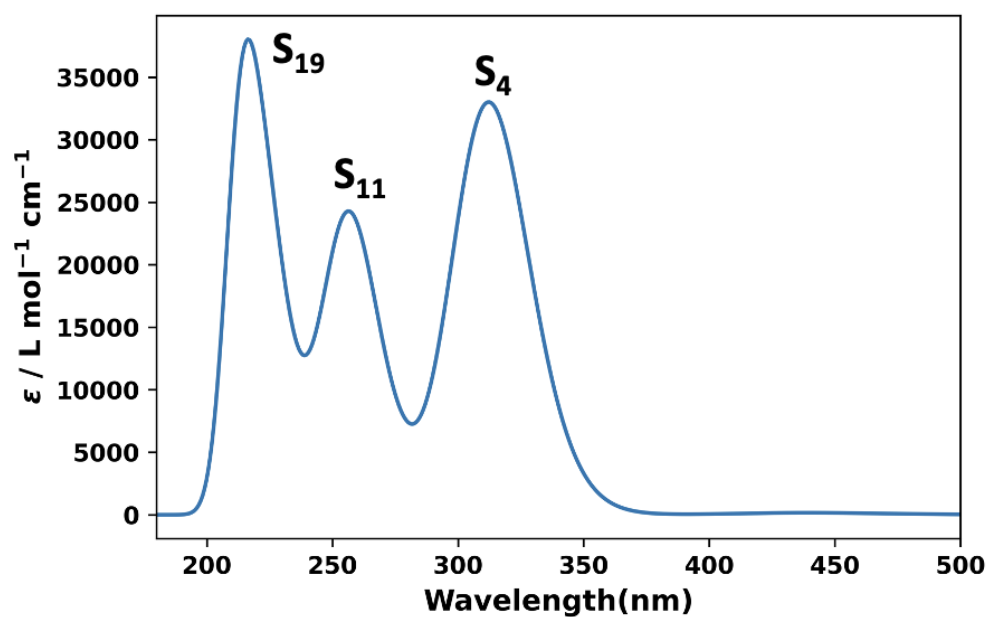

**Figure S15:** Simulated UV-Vis absorption spectra of Npe:TCNB conformer b, computed with CAM-B3LYP-D3/6-31+G(d,p).

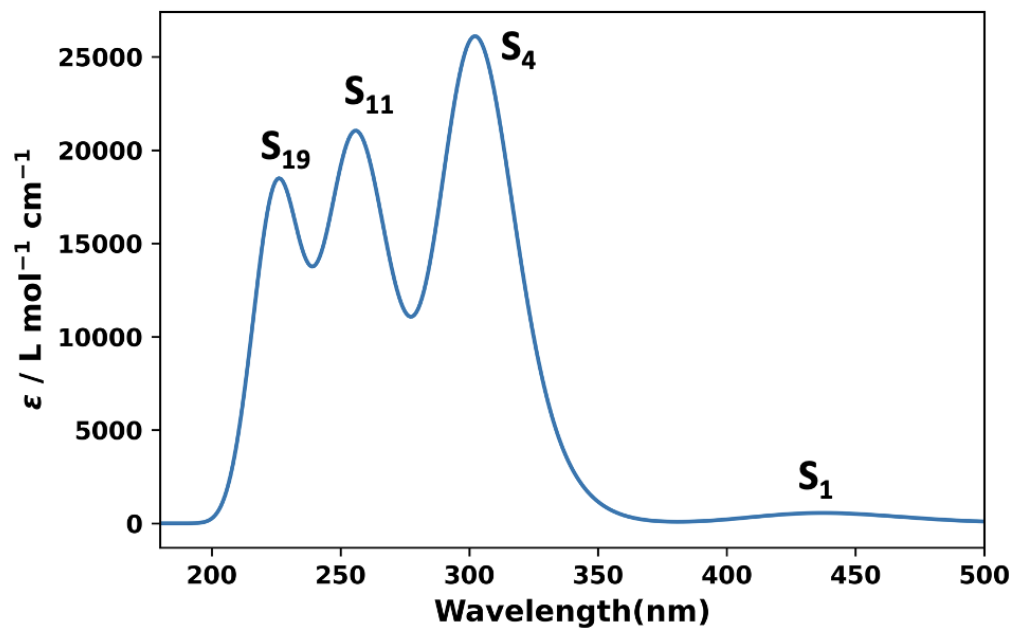

**Figure S16:** Simulated UV-Vis absorption spectra of Npe:TCNB conformer c, computed with CAM-B3LYP-D3/6-31+G(d,p).

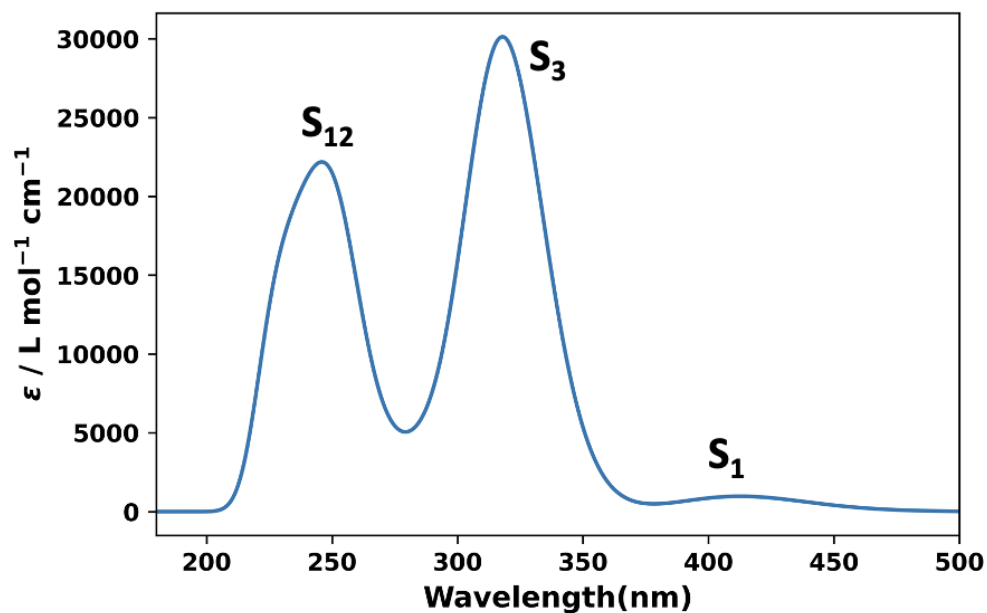

**Figure S17:** Simulated UV-Vis absorption spectra of Npe:TCNB conformer d, computed with CAM-B3LYP-D3/6-31+G(d,p).

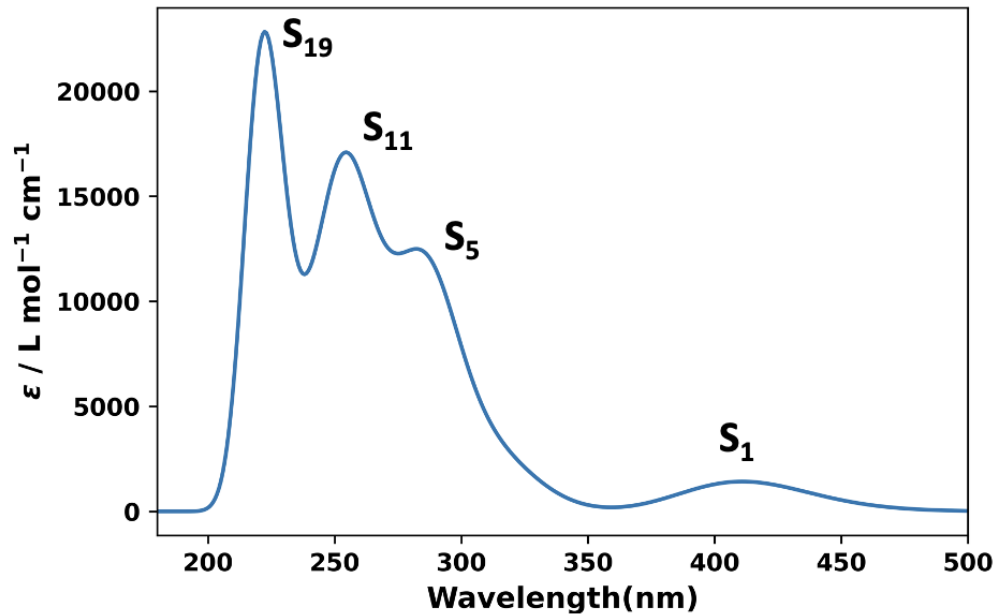

**Figure S18:** Simulated UV-Vis absorption spectra of Npe:TCNB conformer e, computed with CAM-B3LYP-D3/6-31+G(d,p).

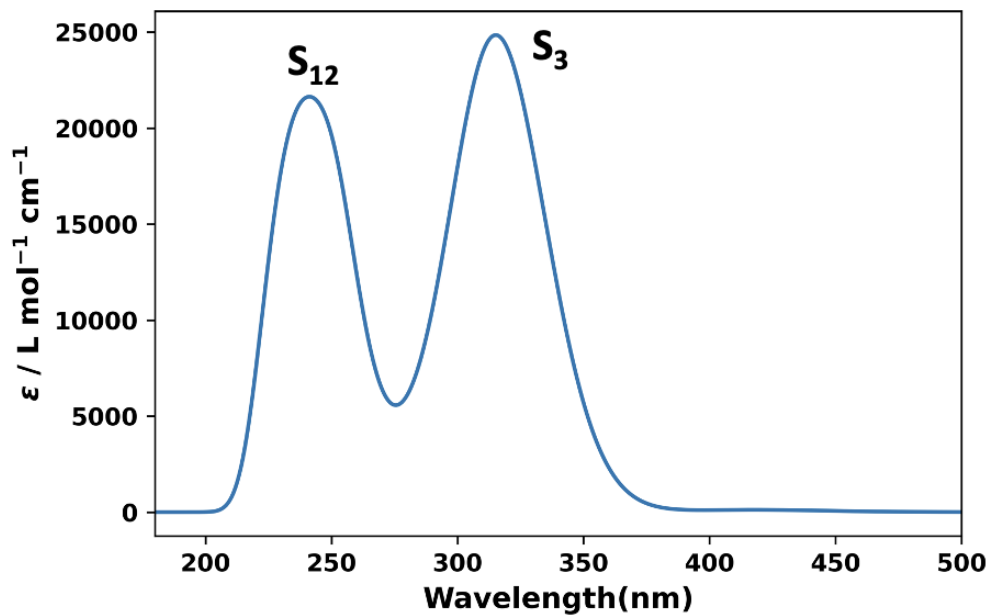

**Figure S19:** Simulated UV-Vis absorption spectra of Npe:TCNB conformer f, computed with CAM-B3LYP-D3/6-31+G(d,p).

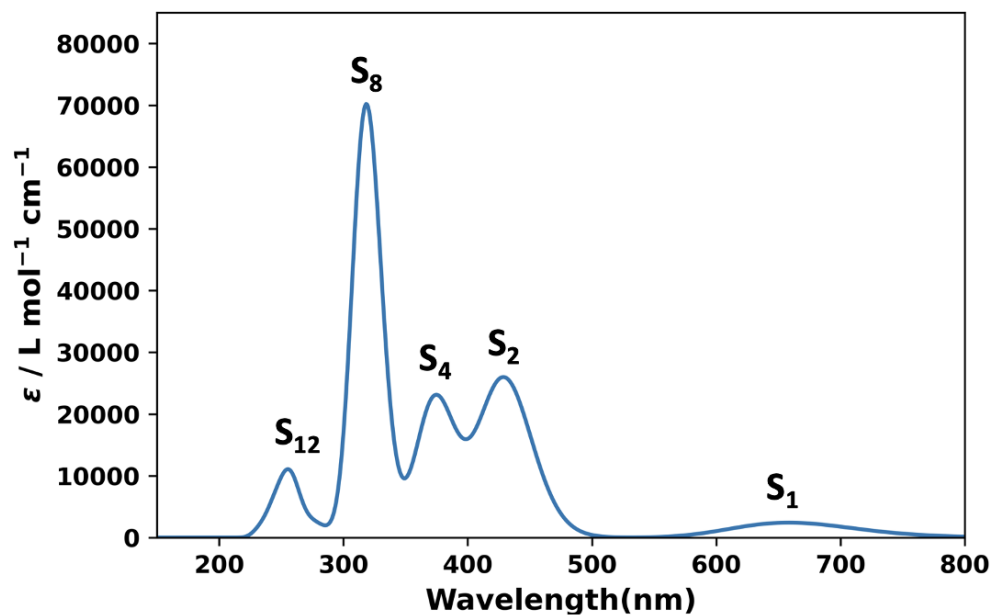

**Figure S20:** Simulated UV-Vis absorption spectra of Npe:TCNQ conformer a, computed with CAM-B3LYP-D3/6-31+G(d,p).

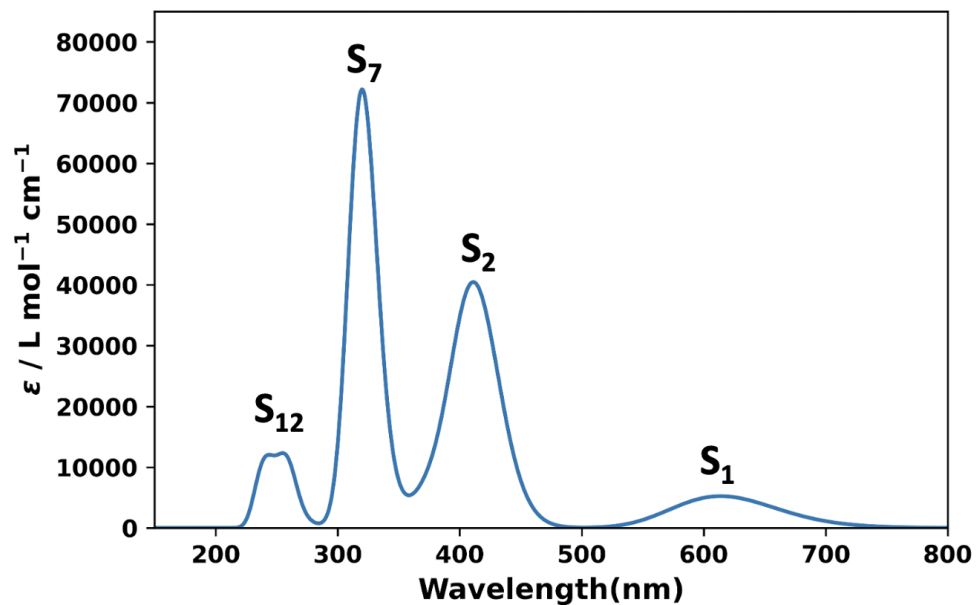

**Figure S21:** Simulated UV-Vis absorption spectra of Npe:TCNQ conformer b, computed with CAM-B3LYP-D3/6-31+G(d,p).

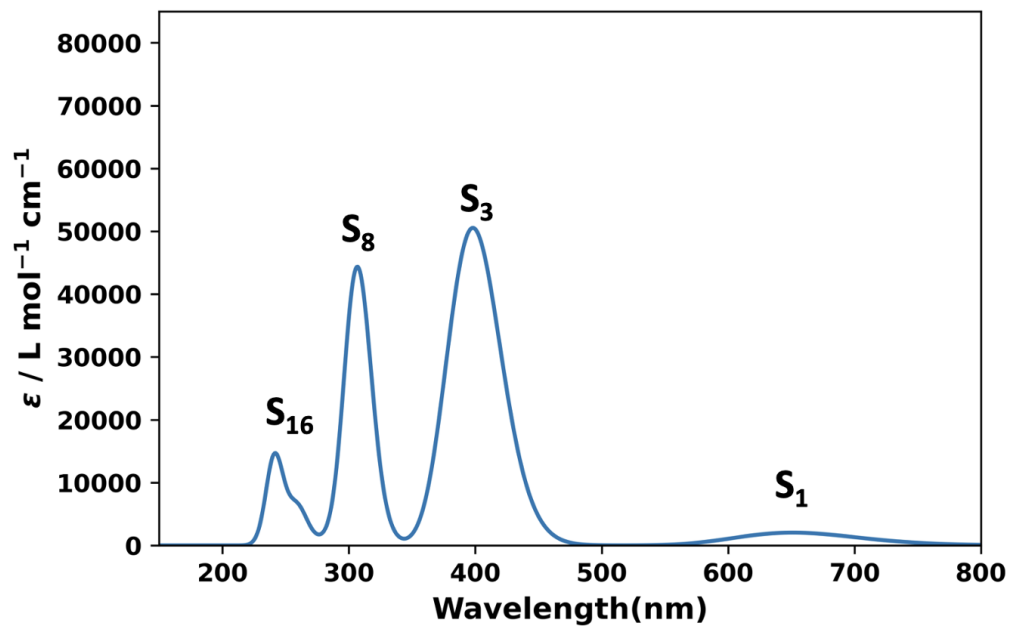

**Figure S22:** Simulated UV-Vis absorption spectra of Npe:TCNQ conformer c, computed with CAM-B3LYP-D3/6-31+G(d,p).

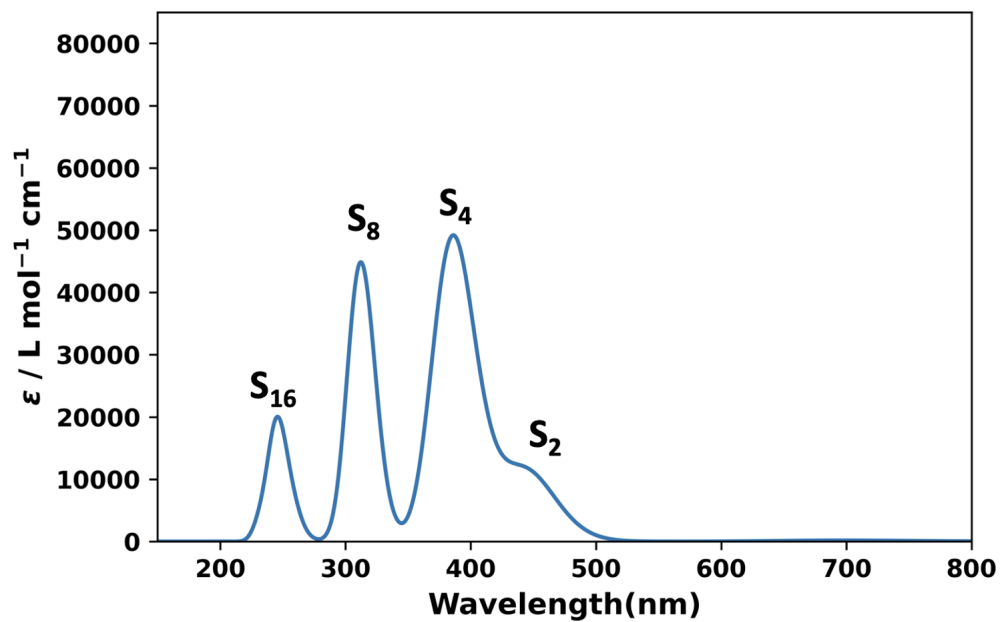

**Figure S23:** Simulated UV-Vis absorption spectra of Npe:TCNQ conformer d, computed with CAM-B3LYP-D3/6-31+G(d,p).



## 2.4 Energetics

**Table S1:** Relative energies of Npe:TCNQ conformers optimized with different functionals and basis sets. All relative energies are zero-point energy corrected.

| Model Chemistry / Conformer  | a     | b     | c     | d     |
|------------------------------|-------|-------|-------|-------|
| B3LYP/6-31G(d,p)             | 0.000 | 0.096 | 0.014 | 0.014 |
| B3LYP/6-31+G(d,p)            | 0.016 | 0.000 | 0.029 | 0.027 |
| B3LYP/6-311+G(d,p)           | 0.017 | 0.000 | N/A   | 0.024 |
| B3LYP-D3/6-31G(d,p)          | 0.016 | 0.000 | 0.077 | 0.106 |
| B3LYP-D3/6-31+G(d,p)         | 0.008 | 0.000 | 0.074 | 0.102 |
| B3LYP-D3/6-311+G(d,p)        | 0.007 | 0.000 | 0.077 | 0.104 |
| CAM-B3LYP/6-31G(d,p)         | 0.000 | 0.080 | 0.068 | 0.019 |
| CAM-B3LYP/6-31+G(d,p)        | 0.006 | 0.059 | 0.000 | 0.000 |
| CAM-B3LYP/6-311+G(d,p)       | 0.004 | 0.056 | 0.000 | 0.000 |
| CAM-B3LYP-D3/6-31G(d,p)      | 0.000 | 0.003 | 0.024 | 0.028 |
| CAM-B3LYP-D3/6-31+G(d,p)     | 0.000 | 0.010 | 0.026 | 0.029 |
| CAM-B3LYP-D3/6-311+G(d,p)    | 0.000 | 0.010 | 0.031 | 0.034 |
| $\omega$ B97X-D/6-31G(d,p)   | 0.003 | 0.000 | 0.006 | 0.018 |
| $\omega$ B97X-D/6-31+G(d,p)  | 0.000 | 0.006 | 0.017 | 0.032 |
| $\omega$ B97X-D/6-311+G(d,p) | 0.000 | 0.011 | 0.024 | 0.035 |
| M062x/6-31G(d,p)             | 0.012 | 0.000 | 0.040 | 0.055 |
| M062x/6-31+G(d,p)            | 0.013 | 0.000 | 0.042 | 0.054 |
| M062x/6-311+G(d,p)           | 0.010 | 0.000 | 0.048 | 0.062 |

**Table S2:** Relative energies of Npe:TCNB conformers optimized with different functionals and basis sets. All relative energies are zero-point energy corrected.

| Model Chemistry / Conformer  | a     | b     | c     | d     | e     | f     |
|------------------------------|-------|-------|-------|-------|-------|-------|
| B3LYP/6-31G(d,p)             | 0.000 | 0.005 | 0.073 | 0.023 | 0.235 | 0.083 |
| B3LYP/6-31+G(d,p)            | 0.000 | 0.002 | 0.075 | N/A   | 0.215 | 0.078 |
| B3LYP/6-311+G(d,p)           | 0.000 | 0.002 | 0.073 | N/A   | 0.208 | 0.024 |
| B3LYP-D3/6-31G(d,p)          | 0.000 | 0.015 | 0.059 | 0.113 | 0.129 | 0.182 |
| B3LYP-D3/6-31+G(d,p)         | 0.000 | 0.009 | 0.063 | 0.121 | 0.110 | 0.190 |
| B3LYP-D3/6-311+G(d,p)        | 0.000 | 0.013 | 0.066 | 0.129 | 0.106 | 0.203 |
| CAM-B3LYP/6-31G(d,p)         | 0.000 | 0.004 | 0.069 | 0.040 | 0.208 | 0.119 |
| CAM-B3LYP/6-31+G(d,p)        | 0.000 | 0.000 | 0.071 | 0.011 | 0.183 | 0.103 |
| CAM-B3LYP/6-311+G(d,p)       | 0.000 | 0.000 | 0.070 | 0.037 | 0.178 | 0.108 |
| CAM-B3LYP-D3/6-31G(d,p)      | 0.000 | 0.016 | 0.060 | 0.103 | 0.133 | 0.171 |
| CAM-B3LYP-D3/6-31+G(d,p)     | 0.000 | 0.009 | 0.062 | 0.107 | 0.111 | 0.179 |
| CAM-B3LYP-D3/6-311+G(d,p)    | 0.000 | 0.014 | 0.064 | 0.115 | 0.106 | 0.190 |
| $\omega$ B97X-D/6-31G(d,p)   | 0.000 | 0.017 | 0.055 | 0.114 | 0.113 | 0.182 |
| $\omega$ B97X-D/6-31+G(d,p)  | 0.000 | 0.012 | 0.054 | 0.120 | 0.083 | 0.181 |
| $\omega$ B97X-D/6-311+G(d,p) | 0.000 | 0.018 | 0.061 | 0.130 | 0.082 | 0.200 |
| M062x/6-31G(d,p)             | 0.000 | 0.015 | 0.053 | 0.129 | 0.132 | 0.191 |
| M062x/6-31+G(d,p)            | 0.000 | 0.012 | 0.054 | 0.136 | 0.108 | 0.204 |
| M062x/6-311+G(d,p)           | 0.000 | 0.015 | 0.055 | 0.153 | 0.099 | 0.221 |

## 2.5 Excited State Properties

### 2.5.1 Npe:TCNQ

**Table S3:** Excitation energies and oscillator strengths of Npe:TCNQ conformer a at the CAM-B3LYP-D3/6-31+G(d,p) level of theory

| Excited State | Oscillator Strength | E (eV) | E (nm) |
|---------------|---------------------|--------|--------|
| S1            | 0.030               | 1.884  | 658.24 |
| S2            | 0.310               | 2.884  | 429.93 |
| S3            | 0.015               | 3.035  | 408.45 |
| S4            | 0.280               | 3.315  | 374.00 |
| S5            | 0.001               | 3.629  | 341.65 |
| S6            | 0.008               | 3.783  | 327.71 |
| S7            | 0.000               | 3.810  | 325.42 |
| S8            | 0.860               | 3.894  | 318.40 |
| S9            | 0.011               | 4.435  | 279.54 |
| S10           | 0.014               | 4.479  | 276.78 |
| S11           | 0.003               | 4.653  | 266.48 |
| S12           | 0.076               | 4.789  | 258.89 |
| S13           | 0.036               | 4.863  | 254.95 |
| S14           | 0.015               | 4.942  | 250.88 |
| S15           | 0.010               | 4.993  | 248.30 |
| S16           | 0.017               | 5.073  | 244.40 |
| S17           | 0.028               | 5.086  | 243.77 |
| S18           | 0.000               | 5.221  | 237.46 |
| S19           | 0.017               | 5.311  | 233.44 |
| S20           | 0.000               | 5.351  | 231.68 |

**Table S4:** Excitation energies and oscillator strengths of Npe:TCNQ conformer b at the CAM-B3LYP-D3/6-31+G(d,p) level of theory

| Excited State | Oscillator Strength | E (eV) | E (nm) |
|---------------|---------------------|--------|--------|
| S1            | 0.065               | 2.020  | 613.83 |
| S2            | 0.489               | 3.010  | 411.95 |
| S3            | 0.002               | 3.121  | 397.30 |
| S4            | 0.071               | 3.299  | 375.79 |
| S5            | 0.033               | 3.648  | 339.88 |
| S6            | 0.002               | 3.748  | 330.83 |
| S7            | 0.879               | 3.876  | 319.88 |
| S8            | 0.002               | 3.945  | 314.25 |
| S9            | 0.004               | 4.441  | 279.19 |
| S10           | 0.003               | 4.493  | 275.97 |
| S11           | 0.003               | 4.671  | 265.42 |
| S12           | 0.091               | 4.772  | 259.80 |
| S13           | 0.032               | 4.848  | 255.72 |
| S14           | 0.006               | 4.901  | 252.98 |
| S15           | 0.046               | 5.011  | 247.44 |
| S16           | 0.043               | 5.122  | 242.06 |
| S17           | 0.025               | 5.156  | 240.45 |
| S18           | 0.038               | 5.244  | 236.43 |
| S19           | 0.000               | 5.250  | 236.16 |
| S20           | 0.022               | 5.308  | 233.57 |

**Table S5:** Excitation energies and oscillator strengths of Npe:TCNQ conformer c at the CAM-B3LYP-D3/6-31+G(d,p) level of theory

| Excited State | Oscillator Strength | E (eV) | E (nm) |
|---------------|---------------------|--------|--------|
| S1            | 0.025               | 1.905  | 651.01 |
| S2            | 0.066               | 2.947  | 420.74 |
| S3            | 0.418               | 3.080  | 402.50 |
| S4            | 0.243               | 3.219  | 385.20 |
| S5            | 0.001               | 3.713  | 333.89 |
| S6            | 0.003               | 3.743  | 331.28 |
| S7            | 0.001               | 3.885  | 319.13 |
| S8            | 0.547               | 4.042  | 306.76 |
| S9            | 0.011               | 4.389  | 282.48 |
| S10           | 0.000               | 4.502  | 275.38 |
| S11           | 0.003               | 4.755  | 260.73 |
| S12           | 0.070               | 4.777  | 259.57 |
| S13           | 0.002               | 4.867  | 254.74 |
| S14           | 0.011               | 5.063  | 244.90 |
| S15           | 0.036               | 5.090  | 243.59 |
| S16           | 0.125               | 5.143  | 241.09 |
| S17           | 0.001               | 5.227  | 237.19 |
| S18           | 0.008               | 5.237  | 236.74 |
| S19           | 0.004               | 5.332  | 232.54 |
| S20           | 0.005               | 5.367  | 231.01 |

**Table S6:** Excitation energies and oscillator strengths of Npe:TCNQ conformer d at the CAM-B3LYP-D3/6-31+G(d,p) level of theory

| Excited State | Oscillator Strength | E (eV) | E (nm) |
|---------------|---------------------|--------|--------|
| S1            | 0.002               | 1.782  | 695.55 |
| S2            | 0.135               | 2.788  | 444.76 |
| S3            | 0.051               | 3.084  | 402.07 |
| S4            | 0.573               | 3.220  | 385.09 |
| S5            | 0.003               | 3.624  | 342.13 |
| S6            | 0.000               | 3.715  | 333.78 |
| S7            | 0.003               | 3.873  | 320.12 |
| S8            | 0.552               | 3.971  | 312.25 |
| S9            | 0.000               | 4.450  | 278.64 |
| S10           | 0.001               | 4.476  | 277.02 |
| S11           | 0.003               | 4.706  | 263.44 |
| S12           | 0.027               | 4.800  | 258.32 |
| S13           | 0.043               | 4.863  | 254.94 |
| S14           | 0.029               | 5.006  | 247.66 |
| S15           | 0.034               | 5.052  | 245.43 |
| S16           | 0.145               | 5.061  | 244.99 |
| S17           | 0.002               | 5.193  | 238.75 |
| S18           | 0.022               | 5.207  | 238.10 |
| S19           | 0.013               | 5.307  | 233.62 |
| S20           | 0.026               | 5.346  | 231.94 |

## 2.5.2 Npe:TCNB

**Table S7:** Excitation energies and oscillator strengths of Npe:TCNB conformer a at the CAM-B3LYP-D3/6-31+G(d,p) level of theory

| Excited State | Oscillator Strength | E (eV) | E (nm) |
|---------------|---------------------|--------|--------|
| S1            | 0.021               | 2.883  | 430.05 |
| S2            | 0.020               | 3.738  | 331.66 |
| S3            | 0.017               | 3.884  | 319.25 |
| S4            | 0.478               | 3.985  | 311.14 |
| S5            | 0.006               | 4.202  | 295.09 |
| S6            | 0.001               | 4.503  | 275.34 |
| S7            | 0.040               | 4.577  | 270.91 |
| S8            | 0.003               | 4.701  | 263.76 |
| S9            | 0.013               | 4.795  | 258.58 |
| S10           | 0.356               | 4.859  | 255.16 |
| S11           | 0.004               | 4.882  | 253.95 |
| S12           | 0.005               | 4.931  | 251.44 |
| S13           | 0.024               | 5.042  | 245.90 |
| S14           | 0.010               | 5.056  | 245.21 |
| S15           | 0.000               | 5.108  | 242.71 |
| S16           | 0.082               | 5.246  | 236.35 |
| S17           | 0.002               | 5.366  | 231.06 |
| S18           | 0.000               | 5.474  | 226.51 |
| S19           | 0.049               | 5.542  | 223.71 |
| S20           | 0.480               | 5.814  | 213.23 |

**Table S8:** Excitation energies and oscillator strengths of Npe:TCNB conformer b at the CAM-B3LYP-D3/6-31+G(d,p) level of theory

| Excited State | Oscillator Strength | E (eV) | E (nm) |
|---------------|---------------------|--------|--------|
| S1            | 0.003               | 2.823  | 439.18 |
| S2            | 0.026               | 3.778  | 328.21 |
| S3            | 0.066               | 3.881  | 319.46 |
| S4            | 0.463               | 3.986  | 311.07 |
| S5            | 0.012               | 4.154  | 298.50 |
| S6            | 0.003               | 4.498  | 275.61 |
| S7            | 0.063               | 4.575  | 271.01 |
| S8            | 0.003               | 4.684  | 264.68 |
| S9            | 0.019               | 4.770  | 259.92 |
| S10           | 0.033               | 4.795  | 258.55 |
| S11           | 0.209               | 4.821  | 257.20 |
| S12           | 0.090               | 4.899  | 253.09 |
| S13           | 0.004               | 4.988  | 248.56 |
| S14           | 0.021               | 5.018  | 247.09 |
| S15           | 0.020               | 5.069  | 244.61 |
| S16           | 0.030               | 5.220  | 237.53 |
| S17           | 0.019               | 5.385  | 230.23 |
| S18           | 0.001               | 5.486  | 226.00 |
| S19           | 0.257               | 5.495  | 225.65 |
| S20           | 0.526               | 5.786  | 214.28 |

**Table S9:** Excitation energies and oscillator strengths of Npe:TCNB conformer c at the CAM-B3LYP-D3/6-31+G(d,p) level of theory

| Excited State | Oscillator Strength | E (eV) | E (nm) |
|---------------|---------------------|--------|--------|
| S1            | 0.009               | 2.835  | 437.33 |
| S2            | 0.022               | 3.771  | 328.82 |
| S3            | 0.025               | 3.908  | 317.25 |
| S4            | 0.358               | 4.106  | 301.99 |
| S5            | 0.050               | 4.131  | 300.10 |
| S6            | 0.001               | 4.507  | 275.11 |
| S7            | 0.084               | 4.581  | 270.65 |
| S8            | 0.018               | 4.730  | 262.14 |
| S9            | 0.010               | 4.754  | 260.80 |
| S10           | 0.013               | 4.783  | 259.24 |
| S11           | 0.131               | 4.829  | 256.75 |
| S12           | 0.109               | 4.893  | 253.39 |
| S13           | 0.018               | 4.932  | 251.40 |
| S14           | 0.018               | 5.062  | 244.94 |
| S15           | 0.030               | 5.104  | 242.92 |
| S16           | 0.054               | 5.275  | 235.06 |
| S17           | 0.017               | 5.349  | 231.77 |
| S18           | 0.011               | 5.495  | 225.63 |
| S19           | 0.216               | 5.498  | 225.52 |
| S20           | 0.074               | 5.744  | 215.86 |



**Table S10:** Excitation energies and oscillator strengths of Npe:TCNB conformer d at the CAM-B3LYP-D3/6-31+G(d,p) level of theory

| Excited State | Oscillator Strength | E (eV) | E (nm) |
|---------------|---------------------|--------|--------|
| S1            | 0.016               | 3.005  | 412.63 |
| S2            | 0.187               | 3.865  | 320.75 |
| S3            | 0.305               | 3.912  | 316.91 |
| S4            | 0.006               | 4.148  | 298.87 |
| S5            | 0.014               | 4.299  | 288.42 |
| S6            | 0.033               | 4.305  | 288.01 |
| S7            | 0.001               | 4.499  | 275.56 |
| S8            | 0.002               | 4.514  | 274.68 |
| S9            | 0.035               | 4.616  | 268.59 |
| S10           | 0.003               | 4.763  | 260.30 |
| S11           | 0.004               | 4.795  | 258.57 |
| S12           | 0.230               | 4.910  | 252.54 |
| S13           | 0.017               | 4.989  | 248.54 |
| S14           | 0.012               | 5.064  | 244.84 |
| S15           | 0.019               | 5.179  | 239.41 |
| S16           | 0.084               | 5.187  | 239.04 |
| S17           | 0.085               | 5.196  | 238.59 |
| S18           | 0.004               | 5.308  | 233.60 |
| S19           | 0.169               | 5.471  | 226.64 |
| S20           | 0.001               | 5.504  | 225.27 |

**Table S11:** Excitation energies and oscillator strengths of Npe:TCNB conformer e at the CAM-B3LYP-D3/6-31+G(d,p) level of theory

| Excited State | Oscillator Strength | E (eV) | E (nm) |
|---------------|---------------------|--------|--------|
| S1            | 0.023               | 3.018  | 410.88 |
| S2            | 0.007               | 3.898  | 318.04 |
| S3            | 0.027               | 3.927  | 315.71 |
| S4            | 0.004               | 4.133  | 299.95 |
| S5            | 0.165               | 4.315  | 287.33 |
| S6            | 0.003               | 4.556  | 272.12 |
| S7            | 0.058               | 4.583  | 270.52 |
| S8            | 0.006               | 4.776  | 259.60 |
| S9            | 0.100               | 4.799  | 258.36 |
| S10           | 0.012               | 4.803  | 258.16 |
| S11           | 0.113               | 4.928  | 251.62 |
| S12           | 0.014               | 4.955  | 250.22 |
| S13           | 0.023               | 5.069  | 244.60 |
| S14           | 0.007               | 5.094  | 243.38 |
| S15           | 0.011               | 5.126  | 241.89 |
| S16           | 0.035               | 5.198  | 238.52 |
| S17           | 0.026               | 5.434  | 228.15 |
| S18           | 0.004               | 5.471  | 226.63 |
| S19           | 0.270               | 5.566  | 222.74 |
| S20           | 0.088               | 5.675  | 218.49 |

**Table S12:** Excitation energies and oscillator strengths of Npe:TCNB conformer f at the CAM-B3LYP-D3/6-31+G(d,p) level of theory

| Excited State | Oscillator Strength | E (eV) | E (nm) |
|---------------|---------------------|--------|--------|
| S1            | 0.002               | 2.967  | 417.84 |
| S2            | 0.191               | 3.793  | 326.89 |
| S3            | 0.260               | 3.994  | 310.46 |
| S4            | 0.003               | 4.117  | 301.16 |
| S5            | 0.068               | 4.260  | 291.08 |
| S6            | 0.000               | 4.281  | 289.61 |
| S7            | 0.002               | 4.463  | 277.77 |
| S8            | 0.002               | 4.480  | 276.77 |
| S9            | 0.035               | 4.604  | 269.30 |
| S10           | 0.004               | 4.754  | 260.80 |
| S11           | 0.005               | 4.814  | 257.56 |
| S12           | 0.180               | 4.919  | 252.03 |
| S13           | 0.051               | 4.997  | 248.12 |
| S14           | 0.003               | 5.042  | 245.91 |
| S15           | 0.004               | 5.176  | 239.55 |
| S16           | 0.047               | 5.203  | 238.29 |
| S17           | 0.157               | 5.234  | 236.89 |
| S18           | 0.009               | 5.326  | 232.80 |
| S19           | 0.000               | 5.438  | 227.98 |
| S20           | 0.142               | 5.478  | 226.35 |

## 2.6 Geometries

### 2.6.1 Monomer Optimized Geometries

Npe

**E=-709.793714 E<sub>h</sub>**

0 1

|   |          |           |           |
|---|----------|-----------|-----------|
| H | -0.77115 | -0.799086 | 0.879519  |
| H | -0.87117 | 1.741053  | -0.814270 |
| H | -5.38473 | -1.529269 | 1.558058  |
| H | -5.34332 | 1.108336  | -1.594221 |
| N | -5.48399 | -0.210198 | -0.019065 |
| H | -2.91635 | -1.467138 | 1.760004  |
| C | -4.79778 | -0.908312 | 0.886069  |
| H | -2.88553 | 1.277052  | -1.555187 |
| C | -4.77316 | 0.552246  | -0.854454 |
| C | -3.41319 | -0.874530 | 0.998251  |
| C | -3.38982 | 0.654042  | -0.825180 |
| C | -2.66965 | -0.067860 | 0.132785  |
| C | -1.20767 | -0.021327 | 0.258901  |
| C | -0.41240 | 0.915132  | -0.274255 |
| H | 4.46426  | -3.093441 | -0.164285 |
| H | 2.07143  | -3.461807 | -0.755678 |
| H | 0.49422  | -1.600252 | -0.754509 |
| C | 3.77175  | -2.258173 | -0.161917 |
| C | 2.41284  | -2.467786 | -0.485571 |
| H | 0.89869  | 3.135538  | 0.072813  |
| C | 1.52429  | -1.423750 | -0.475151 |
| C | 4.21212  | -0.995547 | 0.129999  |
| H | 4.85043  | 1.564254  | 0.592439  |
| H | 3.30679  | 3.495529  | 0.509980  |
| H | 5.25925  | -0.815125 | 0.354509  |
| C | 1.57026  | 2.282074  | 0.081861  |
| C | 1.04788  | 1.019981  | -0.115663 |
| C | 1.93826  | -0.106187 | -0.141090 |
| C | 3.32075  | 0.108878  | 0.132821  |
| C | 3.79480  | 1.421207  | 0.382219  |
| C | 2.93989  | 2.489203  | 0.337756  |

**TCNB**

**E=-600.830452 E<sub>h</sub>**

0 1

|   |          |           |           |
|---|----------|-----------|-----------|
| N | 3.41977  | 2.049057  | -0.000007 |
| C | 2.43855  | 1.438636  | 0.000008  |
| N | 3.41977  | -2.049060 | 0.000033  |
| C | 2.43855  | -1.438636 | -0.000029 |
| N | -3.41979 | 2.049011  | 0.000000  |
| C | -2.43855 | 1.438627  | 0.000010  |
| N | -3.41978 | -2.049018 | 0.000024  |
| C | -2.43855 | -1.438624 | -0.000028 |
| H | 0.00001  | 2.479386  | 0.000011  |
| H | 0.00000  | -2.479384 | -0.000015 |
| C | 1.20749  | -0.703056 | -0.000010 |
| C | 1.20749  | 0.703057  | 0.000001  |
| C | 0.00000  | 1.396228  | 0.000005  |
| C | -1.20747 | 0.703065  | 0.000002  |
| C | -1.20747 | -0.703061 | -0.000011 |
| C | 0.00000  | -1.396225 | -0.000006 |

**TCNQ**

**E=-678.139475 E<sub>h</sub>**

0 1

|   |          |           |           |
|---|----------|-----------|-----------|
| C | 3.55427  | -0.101710 | -1.200959 |
| C | 3.12639  | -2.070474 | 0.155950  |
| C | 2.63650  | -0.857155 | -0.412279 |
| C | 1.33424  | -0.433766 | -0.208625 |
| H | 1.53135  | 1.388635  | -1.393966 |
| C | 0.85381  | 0.795466  | -0.790202 |
| H | -0.76546 | 2.135349  | -1.034813 |
| C | -0.41817 | 1.208998  | -0.591304 |
| N | 4.28461  | 0.525477  | -1.844522 |
| N | 3.50560  | -3.058588 | 0.625799  |
| C | -3.55427 | 0.101710  | 1.200959  |
| C | -3.12639 | 2.070474  | -0.155950 |
| C | -2.63650 | 0.857155  | 0.412279  |
| C | -1.33424 | 0.433766  | 0.208625  |
| H | -1.53135 | -1.388635 | 1.393966  |
| C | -0.85381 | -0.795466 | 0.790202  |
| H | 0.76546  | -2.135349 | 1.034813  |
| C | 0.41817  | -1.208998 | 0.591304  |
| N | -4.28461 | -0.525477 | 1.844522  |
| N | -3.50560 | 3.058588  | -0.625799 |

## 2.6.2 Npe:TCNQ Optimized Geometries

### Npe:TCNQ conformer a

SCF=-1388.27454303 E<sub>h</sub>

0 1

|   |          |           |           |
|---|----------|-----------|-----------|
| H | -4.55633 | -1.783357 | -2.256453 |
| N | 6.29838  | -0.505046 | -1.267842 |
| H | 6.85494  | 0.169781  | 0.595166  |
| C | 6.03539  | -0.240235 | 0.010943  |
| H | 5.52737  | -1.217057 | -3.039312 |
| C | 5.29845  | -1.006754 | -1.997921 |
| C | -4.33553 | 1.507465  | -1.564542 |
| C | -4.66333 | 0.920872  | 0.773552  |
| C | -3.76942 | 1.326246  | -0.264985 |
| C | -2.43434 | 1.519733  | -0.024928 |
| H | -1.93964 | 2.062737  | -2.084482 |
| C | -1.53331 | 1.917818  | -1.090197 |
| H | 0.44265  | 2.391798  | -1.662886 |
| C | -0.22138 | 2.098107  | -0.857984 |
| N | -4.77895 | 1.660445  | -2.622516 |
| N | -5.36873 | 0.587048  | 1.628205  |
| C | 2.25375  | 1.824747  | 1.978003  |
| C | 2.58277  | 2.413411  | -0.359626 |
| C | 1.68242  | 2.048065  | 0.688143  |
| C | 0.33891  | 1.891972  | 0.462449  |
| H | -0.15724 | 1.343921  | 2.520663  |
| C | -0.56308 | 1.502009  | 1.528429  |
| H | -2.53757 | 1.028620  | 2.102798  |
| C | -1.87686 | 1.329702  | 1.298824  |
| N | 2.70191  | 1.618195  | 3.025184  |
| N | 3.29010  | 2.709813  | -1.226283 |
| H | -0.30949 | -1.291692 | -2.181225 |
| C | -1.22848 | -1.505645 | -1.650085 |
| H | -2.40487 | -1.320037 | -3.416938 |
| C | -2.40797 | -1.516157 | -2.349903 |
| C | -3.63040 | -1.774879 | -1.691677 |
| H | -4.57375 | -2.175445 | 0.183164  |
| C | -3.63992 | -1.994574 | -0.339906 |
| C | -1.19499 | -1.755995 | -0.251409 |
| C | -2.43677 | -1.976713 | 0.412582  |
| H | -3.41487 | -2.318564 | 2.308613  |
| C | -2.45932 | -2.166539 | 1.816370  |
| H | -1.30579 | -2.333295 | 3.605171  |
| C | -1.29073 | -2.170762 | 2.532632  |
| H | 0.85379  | -2.058846 | 2.459461  |
| C | -0.05866 | -1.994626 | 1.877320  |
| C | 0.01998  | -1.778221 | 0.513552  |
| H | 1.36422  | -1.819476 | -1.203254 |
| C | 1.32159  | -1.597396 | -0.142686 |
| H | 2.40538  | -0.930071 | 1.524332  |
| C | 2.43947  | -1.179968 | 0.467267  |
| H | 4.64731  | -0.215224 | 1.651203  |
| C | 4.79714  | -0.458181 | 0.604020  |
| C | 3.75083  | -0.981157 | -0.159817 |
| H | 3.27498  | -1.673730 | -2.162734 |
| C | 4.02880  | -1.261220 | -1.501839 |

**Npe:TCNQ conformer b**

**SCF=-1388.26917485 E<sub>h</sub>**

0 1

|   |          |           |           |
|---|----------|-----------|-----------|
| H | 4.62585  | 3.389692  | -1.826617 |
| N | -5.75810 | 0.986529  | 0.641421  |
| H | -6.06930 | 0.085057  | 2.465172  |
| C | -5.31518 | 0.492087  | 1.797268  |
| H | -5.21563 | 1.883435  | -1.132519 |
| C | -4.84289 | 1.484443  | -0.193042 |
| C | 3.96126  | -1.339672 | -1.040709 |
| C | 3.33787  | -2.726725 | 0.854202  |
| C | 2.92248  | -1.918669 | -0.249337 |
| C | 1.59572  | -1.726564 | -0.537189 |
| H | 1.94589  | -0.408492 | -2.246386 |
| C | 1.18254  | -0.904516 | -1.657838 |
| H | -0.41054 | -0.133139 | -2.805826 |
| C | -0.11818 | -0.748576 | -1.962477 |
| N | 4.79778  | -0.875301 | -1.692091 |
| N | 3.65458  | -3.385330 | 1.751741  |
| C | -3.51024 | -1.887661 | -0.742907 |
| C | -2.89597 | -0.432566 | -2.599359 |
| C | -2.48204 | -1.243342 | -1.497863 |
| C | -1.15614 | -1.392463 | -1.179516 |
| H | -1.50881 | -2.676963 | 0.553185  |
| C | -0.74348 | -2.198846 | -0.047286 |
| H | 0.85197  | -2.960579 | 1.106191  |
| C | 0.55740  | -2.353731 | 0.257790  |
| N | -4.31847 | -2.431550 | -0.118330 |
| N | -3.20021 | 0.241862  | -3.489559 |
| H | 0.48228  | 2.803311  | -0.947693 |
| C | 1.51819  | 2.587000  | -0.719241 |
| H | 2.21927  | 3.815694  | -2.309945 |
| C | 2.49639  | 3.167541  | -1.485021 |
| C | 3.86129  | 2.934836  | -1.206340 |
| H | 5.25641  | 1.947413  | 0.073097  |
| C | 4.21178  | 2.136533  | -0.151903 |
| C | 1.84443  | 1.732759  | 0.367830  |
| C | 3.22292  | 1.525243  | 0.661099  |
| H | 4.64582  | 0.550387  | 1.962864  |
| C | 3.59132  | 0.701189  | 1.753023  |
| H | 2.91927  | -0.540081 | 3.354805  |
| C | 2.63283  | 0.100602  | 2.528026  |
| H | 0.53509  | -0.253754 | 2.817912  |
| C | 1.27188  | 0.276349  | 2.224957  |
| C | 0.85420  | 1.072597  | 1.173205  |
| H | -0.79517 | 1.518496  | -0.166051 |
| C | -0.56751 | 1.199261  | 0.844279  |
| H | -1.40418 | 0.626125  | 2.686653  |
| C | -1.59679 | 0.928853  | 1.660503  |
| H | -3.68121 | 0.051234  | 3.119150  |
| C | -3.97513 | 0.474046  | 2.163693  |
| C | -3.01354 | 0.985110  | 1.288822  |
| H | -2.80861 | 1.946176  | -0.650528 |
| C | -3.48166 | 1.508636  | 0.077710  |



**Npe:TCNQ conformer c**

**SCF=-1388.27262371 E<sub>h</sub>**

0 1

|   |          |           |           |
|---|----------|-----------|-----------|
| C | -1.71706 | -2.872065 | 1.930820  |
| C | -3.81413 | -1.682959 | 1.590617  |
| C | -2.39322 | -1.628375 | 1.733655  |
| C | -1.70780 | -0.444456 | 1.659809  |
| H | 0.26185  | -1.333927 | 1.990844  |
| C | -0.26397 | -0.408786 | 1.787192  |
| H | 1.50220  | 0.740190  | 1.691564  |
| C | 0.42047  | 0.735636  | 1.622589  |
| N | -1.14656 | -3.866894 | 2.086551  |
| N | -4.96510 | -1.706228 | 1.471926  |
| C | -0.22852 | 4.328498  | 0.659245  |
| C | 1.86416  | 3.128415  | 0.971888  |
| C | 0.43617  | 3.116077  | 1.018018  |
| C | -0.26514 | 1.973900  | 1.308505  |
| H | -2.24077 | 2.882685  | 1.073678  |
| C | -1.71542 | 1.955701  | 1.269606  |
| H | -3.48016 | 0.803118  | 1.366108  |
| C | -2.39858 | 0.809573  | 1.430730  |
| N | -0.78883 | 5.294060  | 0.352984  |
| N | 3.01994  | 3.111285  | 0.908024  |
| H | 0.30338  | 1.498617  | -1.850985 |
| C | -0.74234 | 1.220720  | -1.894723 |
| H | -1.36662 | 3.234764  | -2.210458 |
| C | -1.68084 | 2.202552  | -2.094110 |
| C | -3.05444 | 1.880757  | -2.143481 |
| H | -4.50601 | 0.315648  | -2.032009 |
| C | -3.45299 | 0.578468  | -1.996637 |
| C | -1.11744 | -0.139652 | -1.744384 |
| C | -2.50500 | -0.459331 | -1.800044 |
| H | -3.98156 | -2.035056 | -1.695380 |
| C | -2.92142 | -1.806189 | -1.653244 |
| H | -2.31555 | -3.831212 | -1.356759 |
| C | -1.99814 | -2.799088 | -1.460052 |
| H | 0.08689  | -3.295233 | -1.259001 |
| C | -0.62508 | -2.488911 | -1.394688 |
| C | -0.16716 | -1.193189 | -1.515724 |
| H | 1.64303  | -0.037187 | -1.948587 |
| C | 1.26550  | -0.887019 | -1.388438 |
| H | 1.75758  | -2.432295 | -0.058565 |
| C | 2.11953  | -1.571218 | -0.617228 |
| H | 4.06842  | -3.261062 | 0.190320  |
| C | 4.42373  | -2.252964 | 0.000956  |
| C | 3.54287  | -1.259083 | -0.433733 |
| H | 3.45306  | 0.853209  | -0.925170 |
| C | 4.07823  | 0.016040  | -0.637268 |
| H | 5.85789  | 1.215255  | -0.561100 |
| C | 5.43366  | 0.224995  | -0.421044 |
| H | -3.78734 | 2.665473  | -2.298167 |
| H | 6.46416  | -2.709469 | 0.508022  |
| C | 5.76629  | -1.943532 | 0.179780  |
| N | 6.27888  | -0.729453 | -0.024632 |

**Npe:TCNQ conformer d**

**SCF=-1388.27712288 E<sub>h</sub>**

0 1

|   |          |           |           |
|---|----------|-----------|-----------|
| C | 1.96437  | 2.939945  | -1.168401 |
| C | 0.17804  | 4.286118  | -0.218664 |
| C | 0.57747  | 3.070416  | -0.854071 |
| C | -0.31842 | 2.063033  | -1.105012 |
| H | 1.15143  | 0.675985  | -1.946602 |
| C | 0.10562  | 0.807260  | -1.694921 |
| H | -0.43855 | -1.130881 | -2.326495 |
| C | -0.77115 | -0.189572 | -1.904325 |
| N | 3.08807  | 2.811289  | -1.414769 |
| N | -0.16193 | 5.257314  | 0.311373  |
| C | -4.45706 | -0.907976 | -1.472802 |
| C | -2.65959 | -2.314896 | -2.307078 |
| C | -3.06789 | -1.050912 | -1.778920 |
| C | -2.17432 | -0.035615 | -1.568325 |
| H | -3.64551 | 1.352716  | -0.740485 |
| C | -2.60056 | 1.227727  | -0.999144 |
| H | -2.04928 | 3.151568  | -0.331509 |
| C | -1.72153 | 2.218652  | -0.774226 |
| N | -5.58079 | -0.777173 | -1.229822 |
| N | -2.31551 | -3.335215 | -2.730962 |
| H | -0.24142 | -2.692188 | 0.741179  |
| C | -1.10901 | -2.169480 | 1.125063  |
| H | -2.41143 | -3.793258 | 0.673716  |
| C | -2.33169 | -2.790475 | 1.080042  |
| C | -3.48908 | -2.127005 | 1.543040  |
| H | -4.27821 | -0.329417 | 2.382424  |
| C | -3.39178 | -0.852534 | 2.036297  |
| C | -0.96860 | -0.857248 | 1.648350  |
| C | -2.14085 | -0.187074 | 2.103293  |
| H | -2.94271 | 1.634385  | 2.948982  |
| C | -2.04199 | 1.136587  | 2.602598  |
| H | -0.75434 | 2.782160  | 3.038376  |
| C | -0.83053 | 1.771876  | 2.650095  |
| H | 1.29345  | 1.607460  | 2.313795  |
| C | 0.33603  | 1.106216  | 2.218046  |
| C | 0.29574  | -0.179438 | 1.720274  |
| H | 1.55467  | -1.935676 | 1.421827  |
| C | 1.52656  | -0.858383 | 1.291690  |
| H | 2.55909  | 0.820235  | 0.571424  |
| C | 2.59312  | -0.249917 | 0.756677  |
| H | 4.54121  | 0.804155  | -0.776433 |
| C | 4.74612  | -0.214609 | -0.463648 |
| C | 3.83934  | -0.907570 | 0.342644  |
| H | 3.54868  | -2.805430 | 1.355719  |
| C | 4.18461  | -2.213399 | 0.707120  |
| H | 5.65878  | -3.765164 | 0.521818  |
| C | 5.37691  | -2.752263 | 0.246120  |
| H | -4.45310 | -2.621660 | 1.494186  |
| H | 6.62749  | -0.319980 | -1.501202 |
| C | 5.91560  | -0.846719 | -0.871128 |
| N | 6.23974  | -2.094998 | -0.533651 |

### 2.6.3 Npe:TCNB Optimized Geometries

Npe:TCNB conformer a

E=1310.652160 E<sub>h</sub>

0 1

|   |          |           |           |
|---|----------|-----------|-----------|
| N | -4.19737 | -2.835595 | -1.486689 |
| C | -3.42182 | -1.978913 | -1.493854 |
| N | -0.18609 | -3.555226 | -1.909517 |
| C | -0.60947 | -2.483960 | -1.816092 |
| N | 1.07715  | 3.136304  | -1.612539 |
| C | 0.28239  | 2.297536  | -1.590540 |
| N | -2.94264 | 3.874952  | -1.063350 |
| C | -2.52576 | 2.805567  | -1.198513 |
| H | -3.98887 | 0.593542  | -1.201778 |
| H | 0.84996  | -0.272665 | -1.844503 |
| C | -0.66588 | 1.222636  | -1.564000 |
| C | -2.03544 | 1.469537  | -1.372963 |
| C | -2.93321 | 0.405584  | -1.351785 |
| C | -2.47898 | -0.898904 | -1.513803 |
| C | -1.10609 | -1.144895 | -1.689107 |
| C | -0.20862 | -0.082634 | -1.719885 |
| H | 2.36241  | 1.572161  | 0.224087  |
| H | 1.83000  | -1.028540 | 1.738304  |
| H | 6.59010  | 0.756996  | -1.638932 |
| H | 6.15930  | -2.390665 | 0.969763  |
| N | 6.47895  | -0.858957 | -0.368842 |
| H | 4.34539  | 1.649277  | -1.074932 |
| C | 5.96505  | 0.243938  | -0.912714 |
| H | 3.91639  | -1.646458 | 1.663491  |
| C | 5.72414  | -1.497169 | 0.529912  |
| C | 4.70701  | 0.743985  | -0.596979 |
| C | 4.45806  | -1.080182 | 0.914299  |
| C | 3.91417  | 0.071970  | 0.336814  |
| C | 2.57874  | 0.595022  | 0.648710  |
| C | 1.62943  | -0.032120 | 1.356994  |
| H | -4.04906 | -2.551977 | 1.947560  |
| H | -1.82827 | -3.579436 | 1.490948  |
| H | 0.16965  | -2.198775 | 1.346538  |
| C | -3.16556 | -1.924947 | 1.899139  |
| C | -1.90478 | -2.507995 | 1.642203  |
| H | 1.01239  | 2.542203  | 1.760826  |
| C | -0.78049 | -1.726486 | 1.564829  |
| C | -3.26662 | -0.569699 | 2.069488  |
| H | -3.21033 | 2.106556  | 2.317810  |
| H | -1.21000 | 3.544825  | 2.145077  |
| H | -4.23111 | -0.109906 | 2.264897  |
| C | 0.14262  | 1.896226  | 1.803145  |
| C | 0.30328  | 0.534395  | 1.643536  |
| C | -0.84649 | -0.318394 | 1.742979  |
| C | -2.12167 | 0.265921  | 1.992918  |
| C | -2.23249 | 1.671929  | 2.133728  |
| C | -1.12280 | 2.469138  | 2.037773  |

**Npe:TCNB conformer b**

**E=1310.651819 E<sub>h</sub>**

0 1

|   |          |           |           |
|---|----------|-----------|-----------|
| H | -2.87818 | -2.205387 | 0.953701  |
| H | -1.77413 | 0.588261  | 0.426267  |
| N | 1.82302  | 4.367473  | -0.216614 |
| C | 1.83731  | 3.263360  | -0.557493 |
| N | -1.50894 | 2.532258  | -1.748295 |
| C | -0.48962 | 1.993062  | -1.669064 |
| N | 5.28237  | -1.497471 | -0.767701 |
| C | 4.30735  | -0.914794 | -0.981021 |
| N | 2.03043  | -3.243939 | -2.579756 |
| C | 2.01986  | -2.145744 | -2.220159 |
| H | 3.91682  | 1.628642  | -0.361884 |
| H | -0.06893 | -0.521395 | -2.382534 |
| C | 0.74809  | 1.280220  | -1.546743 |
| C | 1.87897  | 1.894332  | -0.981257 |
| C | 3.05080  | 1.164425  | -0.815398 |
| C | 3.10457  | -0.169566 | -1.211167 |
| C | 1.98168  | -0.776924 | -1.795614 |
| C | 0.80617  | -0.048315 | -1.955009 |
| H | -7.49605 | -1.413898 | 0.409416  |
| H | -5.80916 | 1.973431  | -1.198964 |
| N | -6.76130 | 0.322467  | -0.416799 |
| H | -5.27970 | -2.327062 | 1.038062  |
| C | -6.59190 | -0.851331 | 0.191298  |
| H | -3.53102 | 1.223753  | -0.670030 |
| C | -5.65782 | 1.022563  | -0.695176 |
| C | -5.34868 | -1.363552 | 0.542779  |
| C | -4.37207 | 0.600806  | -0.387302 |
| C | -4.19584 | -0.626899 | 0.260748  |
| C | -2.88305 | -1.163106 | 0.642191  |
| C | -1.73789 | -0.469154 | 0.667489  |
| H | 3.41129  | 1.979236  | 3.194207  |
| H | 1.14813  | 2.940654  | 2.802745  |
| H | -0.62894 | 1.577393  | 1.844424  |
| C | 2.63224  | 1.363496  | 2.756936  |
| C | 1.34800  | 1.908488  | 2.536240  |
| H | -0.84705 | -2.946701 | 0.168168  |
| C | 0.35300  | 1.141755  | 1.984859  |
| C | 2.88381  | 0.055741  | 2.432421  |
| H | 3.12361  | -2.522550 | 1.713067  |
| H | 1.36709  | -3.911830 | 0.668397  |
| H | 3.86292  | -0.379275 | 2.610980  |
| C | -0.10880 | -2.335305 | 0.676059  |
| C | -0.41923 | -1.028852 | 0.997315  |
| C | 0.58570  | -0.208822 | 1.611629  |
| C | 1.87507  | -0.762023 | 1.860287  |
| C | 2.13609  | -2.114062 | 1.522104  |
| C | 1.16020  | -2.884599 | 0.947736  |

**Npe:TCNB conformer c**

**E=1310.649880 E<sub>h</sub>**

0 1

|   |          |           |           |
|---|----------|-----------|-----------|
| H | 2.43359  | 2.055117  | 0.490868  |
| H | 2.12211  | -0.911518 | 1.152582  |
| N | -5.54502 | -0.304294 | 0.650060  |
| C | -4.52013 | -0.608984 | 0.211457  |
| N | -4.26690 | 0.987685  | -3.037543 |
| C | -3.61261 | 0.322062  | -2.356088 |
| N | 0.37379  | -3.632404 | 1.506409  |
| C | -0.30327 | -2.971002 | 0.843206  |
| N | 1.70868  | -2.207356 | -2.027817 |
| C | 0.63846  | -1.967668 | -1.663239 |
| H | -2.76471 | -2.165420 | 1.437096  |
| H | -1.15312 | -0.473747 | -2.937129 |
| C | -2.78297 | -0.514771 | -1.539428 |
| C | -3.23388 | -0.987144 | -0.296101 |
| C | -2.41737 | -1.807910 | 0.476717  |
| C | -1.14514 | -2.145121 | 0.027869  |
| C | -0.68581 | -1.659188 | -1.208670 |
| C | -1.50828 | -0.851389 | -1.986750 |
| H | 7.11737  | 2.093539  | -0.305781 |
| H | 6.06918  | -1.817132 | -1.022037 |
| N | 6.70641  | 0.111893  | -0.684349 |
| H | 4.81267  | 2.677518  | 0.397193  |
| C | 6.33921  | 1.334601  | -0.298914 |
| H | 3.72157  | -1.414039 | -0.383574 |
| C | 5.75987  | -0.830044 | -0.689107 |
| C | 5.04751  | 1.661970  | 0.093921  |
| C | 4.44202  | -0.607547 | -0.312700 |
| C | 4.06302  | 0.670786  | 0.106897  |
| C | 2.69757  | 1.001237  | 0.535513  |
| C | 1.80899  | 0.121684  | 1.013099  |
| H | -3.03535 | 3.549681  | -1.129261 |
| H | -0.81076 | 3.063991  | -2.137196 |
| H | 0.79345  | 1.636561  | -0.973567 |
| C | -2.32588 | 2.925806  | -0.596869 |
| C | -1.06276 | 2.650610  | -1.165955 |
| H | 0.68684  | -0.840205 | 3.165308  |
| C | -0.15918 | 1.854630  | -0.509135 |
| C | -2.65890 | 2.378077  | 0.613140  |
| H | -3.10631 | 1.147790  | 2.948756  |
| H | -1.55048 | -0.384045 | 4.117309  |
| H | -3.63567 | 2.561663  | 1.050336  |
| C | 0.01391  | -0.167392 | 2.643105  |
| C | 0.44241  | 0.428914  | 1.473885  |
| C | -0.46002 | 1.287471  | 0.759271  |
| C | -1.74921 | 1.543601  | 1.314428  |
| C | -2.12274 | 0.937053  | 2.539874  |
| C | -1.26131 | 0.088255  | 3.184203  |

**Npe:TCNB conformer d**

**E=1310.648214 E<sub>h</sub>**

0 1

|   |          |           |           |
|---|----------|-----------|-----------|
| N | 0.22911  | 3.953242  | 0.125114  |
| C | -0.36723 | 3.047025  | -0.273663 |
| N | -3.83041 | 3.676900  | 0.513116  |
| C | -3.21829 | 2.844039  | -0.003771 |
| N | -3.67218 | -2.482557 | -2.487241 |
| C | -3.10091 | -1.543445 | -2.130705 |
| N | 0.38564  | -2.250698 | -2.727678 |
| C | -0.24421 | -1.370444 | -2.322601 |
| H | 0.73070  | 0.923290  | -1.416397 |
| H | -4.20396 | 0.584523  | -0.988557 |
| C | -2.40700 | -0.372813 | -1.678422 |
| C | -1.00944 | -0.280740 | -1.791490 |
| C | -0.34812 | 0.857536  | -1.340505 |
| C | -1.07047 | 1.896811  | -0.763103 |
| C | -2.46788 | 1.798413  | -0.635460 |
| C | -3.13016 | 0.667638  | -1.101173 |
| H | 0.18853  | -2.564153 | 0.675098  |
| H | 0.84800  | 0.160683  | 1.886372  |
| H | -4.49379 | -2.624939 | 0.991475  |
| H | -3.53772 | 0.892717  | 2.898044  |
| N | -4.13282 | -0.836611 | 1.948601  |
| H | -2.11194 | -3.160699 | 0.590783  |
| C | -3.71810 | -1.947087 | 1.337565  |
| H | -1.12487 | 0.517423  | 2.605748  |
| C | -3.18595 | -0.001108 | 2.389341  |
| C | -2.37954 | -2.248919 | 1.115623  |
| C | -1.82606 | -0.213132 | 2.218183  |
| C | -1.38894 | -1.359751 | 1.542305  |
| C | 0.01209  | -1.629900 | 1.203043  |
| C | 1.03860  | -0.792233 | 1.402112  |
| H | 5.50593  | 2.938627  | -0.820779 |
| H | 3.20983  | 3.429081  | 0.034363  |
| H | 1.80149  | 1.646764  | 0.869916  |
| C | 4.88180  | 2.131537  | -0.452132 |
| C | 3.58326  | 2.410284  | 0.029208  |
| H | 2.32914  | -3.140956 | 1.318614  |
| C | 2.78607  | 1.397014  | 0.496120  |
| C | 5.34755  | 0.843591  | -0.447367 |
| H | 6.02528  | -1.754454 | -0.344781 |
| H | 4.60658  | -3.602599 | 0.478629  |
| H | 6.34478  | 0.617734  | -0.813150 |
| C | 2.93254  | -2.320355 | 0.945657  |
| C | 2.41698  | -1.041548 | 0.962419  |
| C | 3.23336  | 0.048935  | 0.510727  |
| C | 4.54437  | -0.225267 | 0.028194  |
| C | 5.02241  | -1.559789 | 0.022801  |
| C | 4.23440  | -2.583787 | 0.475633  |

**Npe:TCNB conformer e**

**E=1310.648088 E<sub>h</sub>**

0 1

|   |          |           |           |
|---|----------|-----------|-----------|
| H | -3.41825 | 2.604684  | -0.410592 |
| H | -1.28625 | 2.855747  | 0.470619  |
| N | 4.73265  | -1.688165 | 1.720057  |
| C | 4.12367  | -0.999329 | 1.019765  |
| N | 3.77916  | -2.789370 | -2.110603 |
| C | 3.42383  | -1.788672 | -1.654638 |
| N | 1.27785  | 4.158862  | 0.889016  |
| C | 1.64821  | 3.158575  | 0.443904  |
| N | 0.13539  | 2.950663  | -2.831288 |
| C | 0.85186  | 2.317476  | -2.182080 |
| H | 3.18801  | 1.387190  | 1.683792  |
| H | 1.87532  | -0.023502 | -2.885214 |
| C | 2.98109  | -0.535162 | -1.117469 |
| C | 3.34419  | -0.137435 | 0.180546  |
| C | 2.91368  | 1.086778  | 0.681016  |
| C | 2.10574  | 1.911624  | -0.095480 |
| C | 1.72701  | 1.506948  | -1.386665 |
| C | 2.17267  | 0.290094  | -1.892928 |
| H | -6.20904 | -0.988816 | -1.849055 |
| H | -4.56756 | -2.349302 | 1.665748  |
| N | -5.44771 | -1.769799 | -0.102855 |
| H | -4.81465 | 1.061644  | -1.812009 |
| C | -5.50204 | -0.822983 | -1.040264 |
| H | -3.09750 | -0.372640 | 1.861232  |
| C | -4.59155 | -1.575779 | 0.902658  |
| C | -4.72018 | 0.325644  | -1.019647 |
| C | -3.76178 | -0.467879 | 1.011132  |
| C | -3.80625 | 0.515029  | 0.019436  |
| C | -2.96278 | 1.722729  | 0.033641  |
| C | -1.71802 | 1.857588  | 0.507534  |
| H | 0.52147  | -3.729570 | -1.316862 |
| H | -0.90290 | -2.064826 | -2.505060 |
| H | -1.53089 | 0.033215  | -1.412690 |
| C | 0.24168  | -2.806110 | -0.821623 |
| C | -0.56279 | -1.859661 | -1.495233 |
| H | -0.56776 | 2.003895  | 2.864960  |
| C | -0.91924 | -0.685831 | -0.882883 |
| C | 0.67996  | -2.545948 | 0.449748  |
| H | 1.43804  | -1.788426 | 2.911530  |
| H | 0.87414  | 0.351136  | 4.018244  |
| H | 1.31099  | -3.259521 | 0.971377  |
| C | -0.32399 | 1.069992  | 2.367950  |
| C | -0.84724 | 0.823681  | 1.116227  |
| C | -0.49701 | -0.390915 | 0.440231  |
| C | 0.33028  | -1.338790 | 1.109877  |
| C | 0.81082  | -1.055290 | 2.413389  |
| C | 0.49906  | 0.130918  | 3.024137  |

**Npe:TCNB conformer f**

**E=1310.645596 E<sub>h</sub>**

0 1

|   |          |           |           |
|---|----------|-----------|-----------|
| H | 0.79238  | -0.458958 | 2.112141  |
| H | 0.59751  | 2.175850  | 0.572725  |
| N | -3.78440 | 3.093156  | -1.733286 |
| C | -3.23200 | 2.082264  | -1.641701 |
| N | 0.19163  | 2.777832  | -2.538019 |
| C | -0.43414 | 1.858024  | -2.224647 |
| N | -3.93412 | -3.514447 | 0.068938  |
| C | -3.33957 | -2.620755 | -0.359174 |
| N | 0.04417  | -3.825343 | -0.785247 |
| C | -0.54485 | -2.847599 | -0.966511 |
| H | -4.31311 | -0.190936 | -0.798734 |
| H | 0.52134  | -0.588452 | -1.855436 |
| C | -1.18783 | 0.712814  | -1.805460 |
| C | -2.55694 | 0.824231  | -1.509200 |
| C | -3.26431 | -0.283952 | -1.051602 |
| C | -2.61125 | -1.499489 | -0.876856 |
| C | -1.24207 | -1.612306 | -1.177145 |
| C | -0.53787 | -0.506915 | -1.643899 |
| H | -3.78782 | -1.332522 | 2.823376  |
| H | -3.79785 | 2.610254  | 1.648439  |
| N | -3.91393 | 0.637105  | 2.231966  |
| H | -1.32919 | -1.491983 | 2.579974  |
| C | -3.21524 | -0.468628 | 2.496256  |
| H | -1.35597 | 2.637017  | 1.352174  |
| C | -3.21940 | 1.711035  | 1.842821  |
| C | -1.83536 | -0.557465 | 2.357492  |
| C | -1.84278 | 1.721319  | 1.668792  |
| C | -1.11134 | 0.551986  | 1.909360  |
| C | 0.33283  | 0.423399  | 1.677802  |
| C | 1.07435  | 1.276895  | 0.958776  |
| H | 5.20371  | -3.302330 | -0.468673 |
| H | 2.72638  | -3.385255 | -0.150007 |
| H | 1.48748  | -1.371272 | 0.379659  |
| C | 4.65534  | -2.393880 | -0.243255 |
| C | 3.25706  | -2.443855 | -0.053087 |
| H | 2.67688  | 3.304517  | 0.777552  |
| C | 2.55698  | -1.303223 | 0.244851  |
| C | 5.30757  | -1.193313 | -0.159007 |
| H | 6.35620  | 1.263598  | -0.020422 |
| H | 5.11464  | 3.367678  | 0.371822  |
| H | 6.37946  | -1.136309 | -0.323707 |
| C | 3.21020  | 2.374547  | 0.605100  |
| C | 2.50925  | 1.186037  | 0.646739  |
| C | 3.20015  | -0.041706 | 0.363253  |
| C | 4.60549  | 0.006572  | 0.126733  |
| C | 5.28477  | 1.250315  | 0.154761  |
| C | 4.59841  | 2.413812  | 0.373584  |



### 3 Crystal data and structure

**Table S13:** Crystal data and structure refinement for CY\_D1 (Npe:TCNB).

|                                                       |                                                                              |
|-------------------------------------------------------|------------------------------------------------------------------------------|
| Identification code                                   | CY_D1                                                                        |
| Empirical formula                                     | C <sub>27</sub> H <sub>15</sub> N <sub>5</sub>                               |
| Formula weight                                        | 409.44                                                                       |
| Temperature/K                                         | 99.95(10)                                                                    |
| Crystal system                                        | monoclinic                                                                   |
| Space group                                           | P21/c                                                                        |
| a/Å                                                   | 6.7312(3)                                                                    |
| b/Å                                                   | 36.6599(13)                                                                  |
| c/Å                                                   | 9.5150(4)                                                                    |
| $\alpha$ /°                                           | 90                                                                           |
| $\beta$ /°                                            | 106.283(4)                                                                   |
| $\gamma$ /°                                           | 90                                                                           |
| Volume/Å <sup>3</sup>                                 | 2253.79(17)                                                                  |
| Z                                                     | 4                                                                            |
| $\rho_{calc}$ /g/cm <sup>3</sup>                      | 1.207                                                                        |
| $\mu$ /mm <sup>-1</sup>                               | 0.586                                                                        |
| F(000)                                                | 848.0                                                                        |
| Crystal size/mm <sup>3</sup>                          | 0.17 × 0.077 × 0.037                                                         |
| Radiation                                             | Cu K $\alpha$ ( $\lambda$ = 1.54184)                                         |
| 2 $\theta$ range for data collection/°                | 9.65 to 144.258                                                              |
| Index ranges                                          | -8 ≤ <i>h</i> ≤ 6, -44 ≤ <i>k</i> ≤ 39, -11 ≤ <i>l</i> ≤ 11                  |
| Reflections collected                                 | 8966                                                                         |
| Independent reflections                               | 4325 [ <i>R</i> <sub>int</sub> = 0.0264, <i>R</i> <sub>sigma</sub> = 0.0314] |
| Data/restraints/parameters                            | 4325/102/353                                                                 |
| Goodness-of-fit on F <sup>2</sup>                     | 1.085                                                                        |
| Final R indexes [ <i>I</i> ≥ 2 $\sigma$ ( <i>I</i> )] | <i>R</i> <sub>1</sub> = 0.1237, w <i>R</i> <sub>2</sub> = 0.3330             |
| Final R indexes [all data]                            | <i>R</i> <sub>1</sub> = 0.1331, w <i>R</i> <sub>2</sub> = 0.3397             |
| Largest diff. peak/hole / e Å <sup>-3</sup>           | 0.94/-0.34                                                                   |

**Table S14:** Fractional Atomic Coordinates ( $\times 10^4$ ) and Equivalent Isotropic Displacement Parameters ( $\text{\AA}^2 \times 10^3$ ) for CY\_D1.  $U_{eq}$  is defined as 1/3 of the trace of the orthogonalised  $U_{IJ}$  tensor.

| Atom | x        | y          | x        | U (eq)   |
|------|----------|------------|----------|----------|
| N2   | -1655(7) | 3894.2(11) | 6917(4)  | 41.4(10) |
| N3   | -1692(5) | 2800.7(10) | 6873(4)  | 29.1(8)  |
| N4   | -4799(5) | 2831.7(10) | -677(4)  | 27.7(8)  |
| N5   | -4820(8) | 3928.5(11) | -541(4)  | 46.0(11) |
| C18  | -2127(7) | 3733.5(11) | 5830(5)  | 30.2(9)  |
| C19  | -2154(6) | 2957.0(10) | 5783(4)  | 21.2(8)  |
| C20  | -2705(6) | 3538.1(11) | 4466(4)  | 23.6(8)  |
| C21  | -2719(5) | 3158.1(10) | 4430(4)  | 19.3(8)  |
| C22  | -3270(5) | 2974.0(10) | 3104(4)  | 19.4(8)  |
| C23  | -3793(5) | 3169.1(11) | 1802(4)  | 20.7(8)  |
| C24  | -4354(6) | 2981.1(11) | 428(4)   | 21.3(8)  |
| C25  | -4372(7) | 3759.5(12) | 508(4)   | 31.4(10) |
| C26  | -3787(6) | 3552.2(11) | 1842(4)  | 23.3(8)  |
| C27  | -3236(7) | 3738.6(11) | 3164(4)  | 27.5(9)  |
| C7   | 2421(9)  | 4079.6(14) | 4804(5)  | 44.1(12) |
| C8   | 2322(6)  | 3689.5(12) | 4587(4)  | 28.1(9)  |
| C9   | 2838(6)  | 3459.6(14) | 5803(5)  | 33.5(10) |
| C10  | 2779(6)  | 3081.6(13) | 5647(5)  | 31.3(10) |
| C11  | 2208(6)  | 2925.3(12) | 4300(5)  | 28.5(9)  |
| C12  | 1697(6)  | 3144.5(11) | 3034(4)  | 24.1(8)  |
| C13  | 1117(6)  | 2979.4(13) | 1631(5)  | 31.5(10) |
| C14  | 613(7)   | 3184.4(15) | 394(5)   | 37.1(11) |
| C15  | 658(7)   | 3563.2(15) | 497(5)   | 37.2(11) |
| C16  | 1207(7)  | 3737.8(13) | 1836(4)  | 31.6(10) |
| C17  | 1750(6)  | 3532.3(12) | 3153(4)  | 24.7(9)  |
| N1   | 3690(20) | 5411(3)    | 6736(13) | 73(3)    |
| C1   | 4550(30) | 5176(3)    | 7748(14) | 90(4)    |
| C2   | 4460(30) | 4801(3)    | 7532(13) | 89(4)    |
| C3   | 3468(19) | 4644(3)    | 6169(11) | 47(2)    |
| C4   | 2350(40) | 4911(8)    | 5190(40) | 69(4)    |
| C5   | 2430(30) | 5265(5)    | 5560(20) | 68(4)    |
| C6   | 3409(19) | 4254(3)    | 5976(12) | 50(2)    |
| N1A  | 2350(30) | 5407(4)    | 6920(20) | 74(4)    |
| C1A  | 2170(40) | 5150(4)    | 7880(20) | 90(4)    |
| C2A  | 2360(40) | 4779(5)    | 7630(20) | 88(4)    |
| C3A  | 2480(30) | 4644(4)    | 6358(17) | 44(3)    |
| C4A  | 2930(60) | 4887(14)   | 5160(60) | 69(5)    |
| C5A  | 3180(50) | 5252(9)    | 5380(40) | 72(5)    |
| C6A  | 2460(30) | 4249(5)    | 6080(19) | 43(3)    |

**Table S15:** Anisotropic Displacement Parameters ( $\text{\AA}^2 \times 10^3$ ) for CY\_D1. The Anisotropic displacement factor exponent takes the form:  $-2\pi^2[h^2a^2U_{11}+2hka^*b^*U_{12}+\dots]$ .

| Atom | $U_{11}$ | $U_{22}$ | $U_{33}$ | $U_{23}$  | $U_{13}$ | $U_{12}$ |
|------|----------|----------|----------|-----------|----------|----------|
| N2   | 57(3)    | 35(2)    | 28(2)    | -6.8(16)  | 4.1(18)  | 4.2(18)  |
| N3   | 31.9(19) | 30.1(19) | 22.3(17) | 0.9(14)   | 2.8(14)  | 0.5(14)  |
| N4   | 28.5(17) | 34.1(19) | 20.6(17) | -1.4(14)  | 7.0(13)  | -0.6(14) |
| N5   | 69(3)    | 38(2)    | 28(2)    | 9.2(17)   | 7.5(19)  | 8(2)     |
| C18  | 39(2)    | 24(2)    | 24(2)    | 1.9(17)   | 4.8(17)  | 3.0(17)  |
| C19  | 21.7(18) | 22.1(18) | 20.7(19) | -0.2(15)  | 7.5(14)  | -0.9(15) |
| C20  | 26(2)    | 27(2)    | 17.0(18) | -1.5(15)  | 4.4(15)  | 0.6(15)  |
| C21  | 14.0(16) | 26.0(19) | 18.0(18) | 0.0(14)   | 4.6(13)  | -0.1(14) |
| C22  | 18.6(17) | 19.9(18) | 20.4(18) | -0.8(14)  | 6.6(14)  | -1.2(14) |
| C23  | 16.1(17) | 27(2)    | 18.5(18) | -1.4(15)  | 4.1(14)  | 0.8(14)  |
| C24  | 16.9(17) | 28.2(19) | 18.6(18) | 1.0(15)   | 4.9(14)  | -0.1(14) |
| C25  | 46(3)    | 26(2)    | 21(2)    | 0.2(17)   | 8.3(18)  | 3.2(18)  |
| C26  | 26(2)    | 27(2)    | 16.3(18) | 1.5(15)   | 4.3(15)  | 2.9(15)  |
| C27  | 39(2)    | 21.9(19) | 20.5(19) | 2.4(15)   | 6.3(17)  | 2.2(17)  |
| C7   | 61(3)    | 35(3)    | 34(2)    | 3(2)      | 9(2)     | 1(2)     |
| C8   | 25(2)    | 33(2)    | 26(2)    | -3.9(17)  | 6.2(16)  | -1.4(16) |
| C9   | 23(2)    | 57(3)    | 19.0(19) | -4.5(18)  | 4.2(16)  | -1.6(19) |
| C10  | 21(2)    | 45(3)    | 27(2)    | 10.3(18)  | 5.3(16)  | -0.3(18) |
| C11  | 19.4(19) | 32(2)    | 36(2)    | 6.9(17)   | 10.4(16) | 3.7(16)  |
| C12  | 15.5(17) | 32(2)    | 26(2)    | 1.9(16)   | 7.5(15)  | -1.8(15) |
| C13  | 19.6(19) | 39(2)    | 37(2)    | -11.4(19) | 10.3(17) | -5.8(17) |
| C14  | 23(2)    | 64(3)    | 24(2)    | -11(2)    | 6.9(17)  | -8(2)    |
| C15  | 29(2)    | 64(3)    | 19(2)    | 5(2)      | 6.7(17)  | 2(2)     |
| C16  | 37(2)    | 36(2)    | 22(2)    | 4.4(17)   | 8.3(17)  | 1.6(18)  |
| C17  | 22.6(19) | 33(2)    | 16.9(18) | -1.1(15)  | 2.6(15)  | 1.0(16)  |
| N1   | 98(8)    | 34(4)    | 83(6)    | -3(4)     | 17(6)    | -2(6)    |
| C1   | 162(10)  | 41(5)    | 59(5)    | 1(4)      | 16(6)    | -7(6)    |
| C2   | 163(10)  | 37(4)    | 57(5)    | -5(4)     | 11(6)    | -9(6)    |
| C3   | 65(6)    | 41(4)    | 38(4)    | -1(3)     | 18(4)    | 9(5)     |
| C4   | 86(13)   | 39(5)    | 78(5)    | 3(4)      | 17(8)    | 12(8)    |
| C5   | 87(12)   | 42(4)    | 76(6)    | -2(4)     | 23(7)    | 16(7)    |
| C6   | 65(6)    | 41(4)    | 40(4)    | 1(3)      | 11(5)    | 4(5)     |
| N1A  | 89(10)   | 39(6)    | 80(8)    | 5(6)      | -1(9)    | -8(8)    |
| C1A  | 162(11)  | 33(6)    | 57(7)    | -6(5)     | 4(8)     | 1(7)     |
| C2A  | 160(11)  | 36(6)    | 52(6)    | -12(5)    | 3(8)     | 5(7)     |
| C3A  | 58(7)    | 38(5)    | 40(5)    | 3(4)      | 22(5)    | 5(6)     |
| C4A  | 91(14)   | 38(6)    | 78(6)    | -1(5)     | 20(9)    | 14(9)    |
| C5A  | 91(14)   | 41(6)    | 80(7)    | -3(6)     | 17(9)    | 12(9)    |
| C6A  | 59(7)    | 38(5)    | 34(5)    | -1(4)     | 17(6)    | 5(6)     |

**Table S16:** Bond Lengths for CY\_D1.

| <b>Atom</b> | <b>Atom</b> | <b>Length/Å</b> | <b>Atom</b> | <b>Atom</b> | <b>Length/Å</b> |
|-------------|-------------|-----------------|-------------|-------------|-----------------|
| N2          | C18         | 1.155(6)        | C11         | C12         | 1.408(6)        |
| N3          | C19         | 1.149(5)        | C12         | C13         | 1.417(6)        |
| N4          | C24         | 1.148(5)        | C12         | C17         | 1.426(6)        |
| N5          | C25         | 1.141(6)        | C13         | C14         | 1.357(7)        |
| C18         | C20         | 1.437(5)        | C14         | C15         | 1.392(7)        |
| C19         | C21         | 1.439(5)        | C15         | C16         | 1.381(6)        |
| C20         | C21         | 1.393(5)        | C16         | C17         | 1.419(5)        |
| C20         | C27         | 1.398(5)        | N1          | C1          | 1.300(16)       |
| C21         | C22         | 1.387(5)        | N1          | C5          | 1.31(2)         |
| C22         | C23         | 1.388(5)        | C1          | C2          | 1.390(15)       |
| C23         | C24         | 1.432(5)        | C2          | C3          | 1.404(15)       |
| C23         | C26         | 1.405(5)        | C3          | C4          | 1.41(3)         |
| C25         | C26         | 1.437(5)        | C3          | C6          | 1.440(14)       |
| C26         | C27         | 1.388(5)        | C4          | C5          | 1.34(3)         |
| C7          | C8          | 1.444(6)        | N1A         | C1A         | 1.34(3)         |
| C7          | C6          | 1.296(12)       | N1A         | C5A         | 1.80(4)         |
| C7          | C6A         | 1.358(17)       | C1A         | C2A         | 1.40(2)         |
| C8          | C9          | 1.394(6)        | C2A         | C3A         | 1.33(2)         |
| C8          | C17         | 1.431(5)        | C3A         | C4A         | 1.55(6)         |
| C9          | C10         | 1.393(7)        | C3A         | C6A         | 1.47(2)         |
| C10         | C11         | 1.358(6)        | C4A         | C5A         | 1.36(4)         |

**Table S17:** Bond Angles for CY\_D1.

| <b>Atom</b> | <b>Atom</b> | <b>Atom</b> | <b>Angle/°</b> | <b>Atom</b> | <b>Atom</b> | <b>Atom</b> | <b>Angle/°</b> |
|-------------|-------------|-------------|----------------|-------------|-------------|-------------|----------------|
| N2          | C18         | C20         | 179.1(5)       | C11         | C12         | C17         | 120.4(4)       |
| N3          | C19         | C21         | 179.0(4)       | C13         | C12         | C17         | 119.7(4)       |
| C21         | C20         | C18         | 121.2(3)       | C14         | C13         | C12         | 121.1(4)       |
| C21         | C20         | C27         | 120.4(3)       | C13         | C14         | C15         | 119.8(4)       |
| C27         | C20         | C18         | 118.4(4)       | C16         | C15         | C14         | 121.5(4)       |
| C20         | C21         | C19         | 119.5(3)       | C15         | C16         | C17         | 120.3(4)       |
| C22         | C21         | C19         | 120.0(3)       | C12         | C17         | C8          | 118.1(4)       |
| C22         | C21         | C20         | 120.5(3)       | C16         | C17         | C8          | 124.2(4)       |
| C21         | C22         | C23         | 119.8(3)       | C16         | C17         | C12         | 117.7(4)       |
| C22         | C23         | C24         | 120.2(3)       | C1          | N1          | C5          | 113.9(12)      |
| C22         | C23         | C26         | 119.6(3)       | N1          | C1          | C2          | 123.7(12)      |
| C26         | C23         | C24         | 120.2(3)       | C1          | C2          | C3          | 122.1(11)      |
| N4          | C24         | C23         | 179.7(5)       | C2          | C3          | C4          | 110.6(17)      |
| N5          | C25         | C26         | 179.0(5)       | C2          | C3          | C6          | 120.8(9)       |
| C23         | C26         | C25         | 120.5(3)       | C4          | C3          | C6          | 127.8(17)      |
| C27         | C26         | C23         | 121.0(3)       | C5          | C4          | C3          | 121(2)         |
| C27         | C26         | C25         | 118.5(4)       | N1          | C5          | C4          | 125.9(16)      |
| C26         | C27         | C20         | 118.8(4)       | C7          | C6          | C3          | 126.1(9)       |
| C6          | C7          | C8          | 127.2(7)       | C1A         | N1A         | C5A         | 116.3(18)      |
| C6A         | C7          | C8          | 124.8(9)       | N1A         | C1A         | C2A         | 122(2)         |
| C9          | C8          | C7          | 119.3(4)       | C3A         | C2A         | C1A         | 123.8(19)      |
| C9          | C8          | C17         | 119.0(4)       | C2A         | C3A         | C4A         | 122(2)         |
| C17         | C8          | C7          | 121.6(4)       | C2A         | C3A         | C6A         | 122.2(15)      |
| C10         | C9          | C8          | 121.4(4)       | C6A         | C3A         | C4A         | 115(2)         |
| C11         | C10         | C9          | 120.8(4)       | C5A         | C4A         | C3A         | 120(4)         |
| C10         | C11         | C12         | 120.2(4)       | C4A         | C5A         | N1A         | 113(3)         |
| C11         | C12         | C13         | 119.9(4)       | C7          | C6A         | C3A         | 127.6(14)      |

**Table S18:** Torsion Angles for CY\_D1.

| <b>A</b> | <b>B</b> | <b>C</b> | <b>D</b> | <b>Angle/°</b> | <b>A</b> | <b>B</b> | <b>C</b> | <b>D</b> | <b>Angle/°</b> |
|----------|----------|----------|----------|----------------|----------|----------|----------|----------|----------------|
| C18      | C20      | C21      | C19      | 0.3(6)         | C13      | C12      | C17      | C16      | 0.0(6)         |
| C18      | C20      | C21      | C22      | -179.6(4)      | C13      | C14      | C15      | C16      | 0.0(7)         |
| C18      | C20      | C27      | C26      | 179.7(4)       | C14      | C15      | C16      | C17      | 0.2(7)         |
| C19      | C21      | C22      | C23      | -179.3(3)      | C15      | C16      | C17      | C8       | -179.5(4)      |
| C20      | C21      | C22      | C23      | 0.6(5)         | C15      | C16      | C17      | C12      | -0.2(6)        |
| C21      | C20      | C27      | C26      | 0.4(6)         | C17      | C8       | C9       | C10      | -0.9(6)        |
| C21      | C22      | C23      | C24      | 179.7(3)       | C17      | C12      | C13      | C14      | 0.1(6)         |
| C21      | C22      | C23      | C26      | -0.9(5)        | N1       | C1       | C2       | C3       | 2(3)           |
| C22      | C23      | C26      | C25      | -178.5(4)      | C1       | N1       | C5       | C4       | -17(2)         |
| C22      | C23      | C26      | C27      | 0.9(6)         | C1       | C2       | C3       | C4       | -9(2)          |
| C23      | C26      | C27      | C20      | -0.7(6)        | C1       | C2       | C3       | C6       | 179.7(15)      |
| C24      | C23      | C26      | C25      | 1.0(6)         | C2       | C3       | C4       | C5       | 4(3)           |
| C24      | C23      | C26      | C27      | -179.6(4)      | C2       | C3       | C6       | C7       | 174.8(13)      |
| C25      | C26      | C27      | C20      | 178.7(4)       | C3       | C4       | C5       | N1       | 9(3)           |
| C27      | C20      | C21      | C19      | 179.6(4)       | C4       | C3       | C6       | C7       | 6(2)           |
| C27      | C20      | C21      | C22      | -0.3(6)        | C5       | N1       | C1       | C2       | 11(3)          |
| C7       | C8       | C9       | C10      | -179.6(4)      | C6       | C7       | C8       | C9       | 18.3(10)       |
| C7       | C8       | C17      | C12      | 179.8(4)       | C6       | C7       | C8       | C17      | -160.2(8)      |
| C7       | C8       | C17      | C16      | -1.0(7)        | C6       | C3       | C4       | C5       | 174.4(14)      |
| C8       | C7       | C6       | C3       | -179.4(9)      | N1A      | C1A      | C2A      | C3A      | -9(4)          |
| C8       | C7       | C6A      | C3A      | -177.4(13)     | C1A      | N1A      | C5A      | C4A      | 18(3)          |
| C8       | C9       | C10      | C11      | -0.2(6)        | C1A      | C2A      | C3A      | C4A      | 15(4)          |
| C9       | C8       | C17      | C12      | 1.2(6)         | C1A      | C2A      | C3A      | C6A      | -173(2)        |
| C9       | C8       | C17      | C16      | -179.6(4)      | C2A      | C3A      | C4A      | C5A      | -1(4)          |
| C9       | C10      | C11      | C12      | 1.0(6)         | C2A      | C3A      | C6A      | C7       | 175(2)         |
| C10      | C11      | C12      | C13      | 179.6(4)       | C3A      | C4A      | C5A      | N1A      | -14(3)         |
| C10      | C11      | C12      | C17      | -0.8(6)        | C4A      | C3A      | C6A      | C7       | -13(3)         |
| C11      | C12      | C13      | C14      | 179.8(4)       | C5A      | N1A      | C1A      | C2A      | -7(3)          |
| C11      | C12      | C17      | C8       | -0.4(6)        | C6A      | C7       | C8       | C9       | -17.9(12)      |
| C11      | C12      | C17      | C16      | -179.6(4)      | C6A      | C7       | C8       | C17      | 163.5(10)      |
| C12      | C13      | C14      | C15      | -0.2(6)        | C6A      | C3A      | C4A      | C5A      | -173(2)        |
| C13      | C12      | C17      | C8       | 179.3(4)       |          |          |          |          |                |

**Table S19:** Crystal data and structure refinement for CY\_B8b (2Npe:3TCNQ).

| <b>Identification code</b>                    | <b>CY_B8b</b>                                               |
|-----------------------------------------------|-------------------------------------------------------------|
| Empirical formula                             | C35H19N6                                                    |
| Formula weight                                | 537.57                                                      |
| Temperature/K                                 | 102(3)                                                      |
| Crystal system                                | triclinic                                                   |
| Space group                                   | P-1                                                         |
| $a/\text{\AA}$                                | 9.8862(4)                                                   |
| $b/\text{\AA}$                                | 11.8127(5)                                                  |
| $c/\text{\AA}$                                | 12.3102(5)                                                  |
| $\alpha/^\circ$                               | 93.827(3)                                                   |
| $\beta/^\circ$                                | 93.940(3)                                                   |
| $\gamma/^\circ$                               | 111.868(4)                                                  |
| Volume/ $\text{\AA}^3$                        | 1324.40(9)                                                  |
| Z                                             | 2                                                           |
| $\rho_{calc}/\text{g/cm}^3$                   | 1.348                                                       |
| $\mu/\text{mm}^{-1}$                          | 0.660                                                       |
| F(000)                                        | 556.0                                                       |
| Crystal size/ $\text{mm}^3$                   | $0.421 \times 0.186 \times 0.044$                           |
| Radiation                                     | Cu K $\alpha$ ( $\lambda = 1.54184$ )                       |
| $2\theta$ range for data collection/ $^\circ$ | 7.234 to 146                                                |
| Index ranges                                  | $-9 \leq h \leq 12, -14 \leq k \leq 14, -15 \leq l \leq 15$ |
| Reflections collected                         | 14402                                                       |
| Independent reflections                       | 5154 [ $R_{int} = 0.0235, R_{sigma} = 0.0209$ ]             |
| Data/restraints/parameters                    | 5154/0/379                                                  |
| Goodness-of-fit on $F^2$                      | 1.031                                                       |
| Final R indexes [ $I \geq 2\sigma(I)$ ]       | $R_1 = 0.0372, wR_2 = 0.1021$                               |
| Final R indexes [all data]                    | $R_1 = 0.0431, wR_2 = 0.1073$                               |
| Largest diff. peak/hole / $e\text{\AA}^{-3}$  | 0.27/-0.20                                                  |

**Table S20:** Fractional Atomic Coordinates ( $\times 10^4$ ) and Equivalent Isotropic Displacement Parameters ( $\text{\AA}^2 \times 10^3$ ) for CY\_B8b.  $U_{eq}$  is defined as 1/3 of the trace of the orthogonalised  $U_{IJ}$  tensor.

| Atom | x           | y          | z          | U(eq)   |
|------|-------------|------------|------------|---------|
| N1   | 1754.8(11)  | 2813.2(9)  | 5140.8(8)  | 24.2(2) |
| C1   | 1194.4(13)  | 3679.2(11) | 5065.0(10) | 25.7(3) |
| C2   | 1780.3(13)  | 4703.0(11) | 4502.8(10) | 24.8(2) |
| C3   | 3050.3(12)  | 4888.3(10) | 3985.9(9)  | 21.4(2) |
| C4   | 3636.5(12)  | 3981.6(10) | 4055.1(9)  | 23.3(2) |
| C5   | 2962.3(12)  | 2987.9(10) | 4627.5(9)  | 23.0(2) |
| C6   | 3680.7(12)  | 5984.6(10) | 3414.4(9)  | 23.3(2) |
| C7   | 4986.0(12)  | 6354.3(10) | 3015.3(9)  | 20.9(2) |
| C8   | 5605.1(12)  | 7426.0(10) | 2399.7(9)  | 20.1(2) |
| C9   | 4924.5(13)  | 8255.1(10) | 2302.6(9)  | 23.5(2) |
| C10  | 5399.9(13)  | 9208.0(10) | 1622.9(10) | 24.9(2) |
| C11  | 6557.8(13)  | 9338.1(10) | 1026.7(9)  | 23.8(2) |
| C12  | 7325.6(12)  | 8546.7(10) | 1121.9(9)  | 20.7(2) |
| C13  | 8543.0(13)  | 8690.5(10) | 522.8(9)   | 24.5(2) |
| C14  | 9327.7(13)  | 7955.6(11) | 630.6(10)  | 26.5(3) |
| C15  | 8917.3(13)  | 7039.1(10) | 1358.3(9)  | 24.1(2) |
| C16  | 7728.9(12)  | 6856.3(10) | 1935.0(9)  | 21.3(2) |
| C17  | 6877.6(12)  | 7591.7(9)  | 1833.5(9)  | 19.1(2) |
| N2   | 3622.3(12)  | 1340.6(10) | 1897.2(9)  | 30.2(2) |
| N3   | 1605.0(11)  | -1815.1(9) | 3678.5(8)  | 26.7(2) |
| N4   | -5149.5(12) | 1092.3(10) | 4599.2(9)  | 33.0(3) |
| N5   | -2828.5(12) | 4011.3(9)  | 2777.1(9)  | 30.5(2) |
| C18  | 2644.7(13)  | 781.7(11)  | 2346.1(9)  | 22.6(2) |
| C19  | 1483.1(12)  | -967.5(10) | 3351.9(9)  | 21.2(2) |
| C20  | 1417.4(12)  | 110.7(10)  | 2917.2(9)  | 20.0(2) |
| C21  | 300.0(12)   | 524.4(10)  | 3037.1(8)  | 19.0(2) |
| C22  | -920.0(12)  | -97.3(10)  | 3649.2(9)  | 18.9(2) |
| C23  | -1954.6(12) | 371.2(10)  | 3802.3(8)  | 19.0(2) |
| C24  | -1880.4(12) | 1493.5(10) | 3351.5(8)  | 18.6(2) |
| C25  | -691.2(12)  | 2083.7(10) | 2705.4(9)  | 20.0(2) |
| C26  | 336.5(12)   | 1618.9(10) | 2554.8(9)  | 20.3(2) |
| C27  | -2902.5(12) | 2000.7(10) | 3524.0(9)  | 20.0(2) |
| C28  | -4128.5(13) | 1468.2(10) | 4135.1(9)  | 23.2(2) |
| C29  | -2839.5(12) | 3119.6(10) | 3092.3(9)  | 22.3(2) |
| N6   | 621.3(11)   | 4687.9(10) | 1454.5(9)  | 31.0(2) |
| N7   | 2584.4(12)  | 7746.7(9)  | -449.0(9)  | 30.1(2) |
| C30  | 1571.4(13)  | 5193.4(10) | 960.2(9)   | 23.0(2) |
| C31  | 2662.4(12)  | 6888.3(10) | -115.6(9)  | 21.8(2) |
| C32  | 2743.4(12)  | 5821.9(10) | 329.2(9)   | 20.1(2) |
| C33  | 3863.1(12)  | 5422.4(9)  | 170.7(8)   | 18.6(2) |
| C34  | 5001.9(12)  | 6044.2(10) | -506.9(9)  | 19.9(2) |
| C35  | 3924.9(12)  | 4367.0(9)  | 671.2(9)   | 19.8(2) |



**Table S21:** Anisotropic Displacement Parameters ( $\text{\AA}^2 \times 10^3$ ) for CY\_B8b. The anisotropic displacement factor exponent takes the form:  $-2\pi^2[h^2a^2U_{11}+2hka*b*U_{12}+\dots]$

| Atom | $U_{11}$ | $U_{22}$ | $U_{33}$ | $U_{23}$ | $U_{13}$ | $U_{12}$ |
|------|----------|----------|----------|----------|----------|----------|
| N1   | 24.8(5)  | 24.2(5)  | 24.2(5)  | 4.3(4)   | 1.9(4)   | 9.9(4)   |
| C1   | 24.8(6)  | 26.7(6)  | 27.9(6)  | 4.9(5)   | 7.3(5)   | 11.4(5)  |
| C2   | 24.5(6)  | 24.2(6)  | 29.6(6)  | 4.8(5)   | 6.1(5)   | 12.6(5)  |
| C3   | 19.6(5)  | 22.5(5)  | 21.8(5)  | 1.7(4)   | 0.6(4)   | 7.9(4)   |
| C4   | 20.3(6)  | 23.7(6)  | 26.6(6)  | 2.4(4)   | 2.7(4)   | 9.2(5)   |
| C5   | 22.1(6)  | 22.0(6)  | 26.1(5)  | 2.2(4)   | 0.1(4)   | 10.0(5)  |
| C6   | 23.5(6)  | 22.9(6)  | 25.3(5)  | 3.8(4)   | 2.3(4)   | 10.7(5)  |
| C7   | 22.0(6)  | 20.0(5)  | 21.4(5)  | 1.8(4)   | 0.8(4)   | 9.0(4)   |
| C8   | 20.6(5)  | 17.8(5)  | 21.5(5)  | 0.2(4)   | -0.7(4)  | 7.5(4)   |
| C9   | 21.7(6)  | 21.1(5)  | 28.2(6)  | 1.0(4)   | 2.0(4)   | 9.1(4)   |
| C10  | 26.5(6)  | 19.1(5)  | 31.7(6)  | 1.0(4)   | -1.7(5)  | 12.7(5)  |
| C11  | 27.8(6)  | 16.9(5)  | 25.6(5)  | 3.5(4)   | -1.8(4)  | 7.8(4)   |
| C12  | 21.5(5)  | 16.6(5)  | 21.9(5)  | 0.9(4)   | -1.1(4)  | 5.4(4)   |
| C13  | 24.2(6)  | 21.4(5)  | 24.6(5)  | 3.6(4)   | 1.8(4)   | 4.6(4)   |
| C14  | 21.9(6)  | 28.0(6)  | 28.0(6)  | -0.4(5)  | 4.4(5)   | 7.8(5)   |
| C15  | 23.2(6)  | 23.4(6)  | 27.5(6)  | -0.2(4)  | 0.3(4)   | 11.6(5)  |
| C16  | 22.8(6)  | 18.3(5)  | 23.1(5)  | 1.6(4)   | -0.4(4)  | 8.7(4)   |
| C17  | 20.4(5)  | 15.8(5)  | 19.7(5)  | 0.5(4)   | -0.5(4)  | 5.8(4)   |
| N2   | 27.9(5)  | 34.9(6)  | 34.3(6)  | 12.1(4)  | 10.4(4)  | 16.8(5)  |
| N3   | 23.7(5)  | 27.0(5)  | 34.0(5)  | 7.8(4)   | 6.1(4)   | 13.5(4)  |
| N4   | 30.8(6)  | 35.3(6)  | 44.7(6)  | 19.4(5)  | 16.1(5)  | 21.4(5)  |
| N5   | 36.0(6)  | 25.3(5)  | 35.4(6)  | 8.2(4)   | 5.2(5)   | 16.6(4)  |
| C18  | 23.1(6)  | 26.7(6)  | 22.9(5)  | 4.8(4)   | 3.3(4)   | 14.4(5)  |
| C19  | 16.6(5)  | 26.1(6)  | 22.8(5)  | 2.1(4)   | 4.0(4)   | 9.9(4)   |
| C20  | 19.6(5)  | 21.5(5)  | 19.8(5)  | 2.2(4)   | 1.3(4)   | 8.9(4)   |
| C21  | 18.5(5)  | 20.2(5)  | 17.6(5)  | 0.9(4)   | 0.0(4)   | 7.1(4)   |
| C22  | 19.6(5)  | 17.4(5)  | 19.8(5)  | 3.7(4)   | 0.7(4)   | 7.2(4)   |
| C23  | 18.7(5)  | 19.1(5)  | 18.8(5)  | 3.6(4)   | 1.9(4)   | 6.6(4)   |
| C24  | 18.6(5)  | 19.4(5)  | 17.8(5)  | 1.8(4)   | -0.8(4)  | 7.8(4)   |
| C25  | 20.0(5)  | 20.1(5)  | 20.6(5)  | 5.3(4)   | 2.2(4)   | 7.7(4)   |
| C26  | 18.9(5)  | 21.3(5)  | 21.0(5)  | 6.0(4)   | 3.7(4)   | 7.2(4)   |
| C27  | 20.2(5)  | 20.7(5)  | 20.7(5)  | 4.2(4)   | 2.7(4)   | 9.1(4)   |
| C28  | 24.7(6)  | 23.9(6)  | 27.9(6)  | 8.3(5)   | 4.6(5)   | 15.7(5)  |
| C29  | 21.4(6)  | 23.6(6)  | 24.8(5)  | 3.3(4)   | 3.8(4)   | 11.6(5)  |
| N6   | 26.3(5)  | 31.5(6)  | 39.5(6)  | 12.3(5)  | 8.2(5)   | 13.4(5)  |
| N7   | 30.0(5)  | 24.2(5)  | 39.2(6)  | 6.8(4)   | -0.2(4)  | 13.9(4)  |
| C30  | 21.9(6)  | 21.8(5)  | 27.8(6)  | 4.0(4)   | 0.1(5)   | 11.2(5)  |
| C31  | 18.3(5)  | 21.5(6)  | 26.2(5)  | 2.0(4)   | 0.0(4)   | 8.7(4)   |
| C32  | 20.2(5)  | 17.7(5)  | 22.6(5)  | 2.5(4)   | 0.0(4)   | 7.8(4)   |
| C33  | 19.2(5)  | 16.1(5)  | 19.6(5)  | 0.6(4)   | -1.6(4)  | 6.3(4)   |
| C34  | 21.5(6)  | 16.5(5)  | 21.0(5)  | 3.7(4)   | -0.3(4)  | 6.7(4)   |
| C35  | 19.7(5)  | 17.5(5)  | 21.2(5)  | 3.8(4)   | 0.9(4)   | 6.0(4)   |

**Table S22:** Bond Lengths for CY\_B8b.

| <b>Atom</b> | <b>Atom</b> | <b>Length/Å</b> | <b>Atom</b> | <b>Atom</b>      | <b>Length/Å</b> |
|-------------|-------------|-----------------|-------------|------------------|-----------------|
| N1          | C1          | 1.3380(15)      | N4          | C28              | 1.1496(15)      |
| N1          | C5          | 1.3433(15)      | N5          | C29              | 1.1431(15)      |
| C1          | C2          | 1.3865(16)      | C18         | C20              | 1.4388(15)      |
| C2          | C3          | 1.3974(15)      | C19         | C20              | 1.4354(15)      |
| C3          | C4          | 1.3994(15)      | C20         | C21              | 1.3769(15)      |
| C3          | C6          | 1.4632(16)      | C21         | C22              | 1.4494(15)      |
| C4          | C5          | 1.3823(16)      | C21         | C26              | 1.4477(14)      |
| C6          | C7          | 1.3391(16)      | C22         | C23              | 1.3499(15)      |
| C7          | C8          | 1.4719(15)      | C23         | C24              | 1.4499(14)      |
| C8          | C9          | 1.3862(15)      | C24         | C25              | 1.4467(14)      |
| C8          | C17         | 1.4360(15)      | C24         | C27              | 1.3743(15)      |
| C9          | C10         | 1.4049(16)      | C25         | C26              | 1.3402(15)      |
| C10         | C11         | 1.3683(16)      | C27         | C28              | 1.4322(15)      |
| C11         | C12         | 1.4123(15)      | C27         | C29              | 1.4389(15)      |
| C12         | C13         | 1.4170(16)      | N6          | C30              | 1.1482(16)      |
| C12         | C17         | 1.4315(15)      | N7          | C31              | 1.1454(15)      |
| C13         | C14         | 1.3697(17)      | C30         | C32              | 1.4342(15)      |
| C14         | C15         | 1.4111(17)      | C31         | C32              | 1.4333(15)      |
| C15         | C16         | 1.3701(16)      | C32         | C33              | 1.3758(15)      |
| C16         | C17         | 1.4224(15)      | C33         | C34              | 1.4483(15)      |
| N2          | C18         | 1.1498(16)      | C33         | C35              | 1.4463(14)      |
| N3          | C19         | 1.1470(15)      | C34         | C35 <sup>1</sup> | 1.3428(15)      |

<sup>1</sup> 1-X,1-Y,-Z.

**Table S23:** Bond Angles for CY\_B8b.

| Atom | Atom | Atom | Angle/Å    | Atom             | Atom | Atom | Angle/Å    |
|------|------|------|------------|------------------|------|------|------------|
| C1   | N1   | C5   | 115.57(10) | C19              | C20  | C18  | 115.22(9)  |
| N1   | C1   | C2   | 124.17(11) | C21              | C20  | C18  | 120.38(10) |
| C1   | C2   | C3   | 119.91(11) | C21              | C20  | C19  | 124.38(10) |
| C2   | C3   | C4   | 116.21(10) | C20              | C21  | C22  | 121.88(10) |
| C2   | C3   | C6   | 119.62(10) | C20              | C21  | C26  | 119.81(10) |
| C4   | C3   | C6   | 124.17(10) | C26              | C21  | C22  | 118.30(9)  |
| C5   | C4   | C3   | 119.46(10) | C23              | C22  | C21  | 120.33(10) |
| N1   | C5   | C4   | 124.66(10) | C22              | C23  | C24  | 120.99(10) |
| C7   | C6   | C3   | 125.51(10) | C25              | C24  | C23  | 118.39(9)  |
| C6   | C7   | C8   | 125.99(10) | C27              | C24  | C23  | 121.76(10) |
| C9   | C8   | C7   | 120.72(10) | C27              | C24  | C25  | 119.85(9)  |
| C9   | C8   | C17  | 118.71(10) | C26              | C25  | C24  | 120.56(10) |
| C17  | C8   | C7   | 120.47(9)  | C25              | C26  | C21  | 121.33(10) |
| C8   | C9   | C10  | 121.78(10) | C24              | C27  | C28  | 123.63(10) |
| C11  | C10  | C9   | 120.35(10) | C24              | C27  | C29  | 122.57(10) |
| C10  | C11  | C12  | 120.35(10) | C28              | C27  | C29  | 113.80(9)  |
| C11  | C12  | C13  | 120.67(10) | N4               | C28  | C27  | 175.58(11) |
| C11  | C12  | C17  | 119.88(11) | N5               | C29  | C27  | 177.29(12) |
| C13  | C12  | C17  | 119.45(10) | N6               | C30  | C32  | 179.17(12) |
| C14  | C13  | C12  | 121.45(11) | N7               | C31  | C32  | 178.37(12) |
| C13  | C14  | C15  | 119.20(11) | C31              | C32  | C30  | 115.29(9)  |
| C16  | C15  | C14  | 121.02(11) | C33              | C32  | C30  | 121.85(10) |
| C15  | C16  | C17  | 121.32(10) | C33              | C32  | C31  | 122.86(10) |
| C12  | C17  | C8   | 118.74(10) | C32              | C33  | C34  | 120.77(10) |
| C16  | C17  | C8   | 123.75(10) | C32              | C33  | C35  | 120.76(10) |
| C16  | C17  | C12  | 117.51(10) | C35              | C33  | C34  | 118.47(10) |
| N2   | C18  | C20  | 178.55(12) | C35 <sup>1</sup> | C34  | C33  | 120.24(10) |
| N3   | C19  | C20  | 176.44(11) | C34 <sup>1</sup> | C35  | C33  | 121.29(10) |

<sup>1</sup> 1-X,1-Y,-Z.

**Table S24:** Torsion angles for CY\_B8b.

| <b>A</b> | <b>B</b> | <b>C</b> | <b>D</b> | <b>Angle/Å</b> | <b>A</b> | <b>B</b> | <b>C</b> | <b>D</b>         | <b>Angle/Å</b> |
|----------|----------|----------|----------|----------------|----------|----------|----------|------------------|----------------|
| N1       | C1       | C2       | C3       | -1.12(19)      | C15      | C16      | C17      | C8               | 178.69(10)     |
| C1       | N1       | C5       | C4       | 0.54(17)       | C15      | C16      | C17      | C12              | -1.19(16)      |
| C1       | C2       | C3       | C4       | 1.48(17)       | C17      | C8       | C9       | C10              | 3.39(16)       |
| C1       | C2       | C3       | C6       | -178.66(11)    | C17      | C12      | C13      | C14              | -1.76(17)      |
| C2       | C3       | C4       | C5       | -0.91(16)      | C18      | C20      | C21      | C22              | -177.19(10)    |
| C2       | C3       | C6       | C7       | 170.55(11)     | C18      | C20      | C21      | C26              | 2.03(16)       |
| C3       | C4       | C5       | N1       | -0.10(18)      | C19      | C20      | C21      | C22              | 1.39(17)       |
| C3       | C6       | C7       | C8       | 177.30(10)     | C19      | C20      | C21      | C26              | -179.39(10)    |
| C4       | C3       | C6       | C7       | -9.60(19)      | C20      | C21      | C22      | C23              | 176.29(10)     |
| C5       | N1       | C1       | C2       | 0.08(17)       | C20      | C21      | C26      | C25              | -176.35(10)    |
| C6       | C3       | C4       | C5       | 179.23(11)     | C21      | C22      | C23      | C24              | 0.66(16)       |
| C6       | C7       | C8       | C9       | 8.48(18)       | C22      | C21      | C26      | C25              | 2.89(16)       |
| C6       | C7       | C8       | C17      | -167.77(11)    | C22      | C23      | C24      | C25              | 1.73(15)       |
| C7       | C8       | C9       | C10      | -172.92(10)    | C22      | C23      | C24      | C27              | -178.23(10)    |
| C7       | C8       | C17      | C12      | 171.41(10)     | C23      | C24      | C25      | C26              | -1.80(15)      |
| C7       | C8       | C17      | C16      | -8.47(16)      | C23      | C24      | C27      | C28              | -1.21(17)      |
| C8       | C9       | C10      | C11      | 0.39(18)       | C23      | C24      | C27      | C29              | 179.40(10)     |
| C9       | C8       | C17      | C12      | -4.92(15)      | C24      | C25      | C26      | C21              | -0.53(16)      |
| C9       | C8       | C17      | C16      | 175.21(10)     | C25      | C24      | C27      | C28              | 178.83(10)     |
| C9       | C10      | C11      | C12      | -2.59(17)      | C25      | C24      | C27      | C29              | -0.57(17)      |
| C10      | C11      | C12      | C13      | -178.80(11)    | C26      | C21      | C22      | C23              | -2.94(15)      |
| C10      | C11      | C12      | C17      | 0.92(17)       | C27      | C24      | C25      | C26              | 178.17(11)     |
| C11      | C12      | C13      | C14      | 177.97(11)     | C30      | C32      | C33      | C34              | 177.46(10)     |
| C11      | C12      | C17      | C8       | 2.84(16)       | C30      | C32      | C33      | C35              | -2.14(16)      |
| C11      | C12      | C17      | C16      | -177.28(10)    | C31      | C32      | C33      | C34              | -2.74(17)      |
| C12      | C13      | C14      | C15      | -0.28(17)      | C31      | C32      | C33      | C35              | 177.65(10)     |
| C13      | C12      | C17      | C8       | -177.44(9)     | C32      | C33      | C34      | C35 <sup>1</sup> | -178.83(10)    |
| C13      | C12      | C17      | C16      | 2.45(16)       | C32      | C33      | C35      | C34 <sup>1</sup> | 178.82(10)     |
| C13      | C14      | C15      | C16      | 1.61(17)       | C34      | C33      | C35      | C34 <sup>1</sup> | -0.79(17)      |
| C14      | C15      | C16      | C17      | -0.84(17)      | C35      | C33      | C34      | C35 <sup>1</sup> | 0.78(17)       |

<sup>1</sup> 1-X,1-Y,-Z.
